# Supplementary material for: Facile syntheses of (+)-gabosines A, D, and E
Source: Royal Society of Chemistry journal article supplement (doi:10.1039/b911810a), 2009-01-01

## **Supporting Information**

### **Facile syntheses of (+)-gabosines A, D, and E**

Tony K. M. Shing<sup>\*</sup> and Hau. M. Cheng

*Department of Chemistry and Center of Novel Functional Molecules*

*The Chinese University of Hong Kong, Shatin, Hong Kong, China*

*tonyshing@cuhk.edu.hk*

*Received date (automatically inserted by publisher)*

#### Appendices

S1 List of contents

S2 General procedures

S3-S10 <sup>1</sup>H, <sup>13</sup>C and DEPT NMR Spectra of compounds **4**, **5**, **12–15** and **17–22**.

## General procedures

Melting points were measured in Celsius degrees and were uncorrected. Optical rotations were operating at 589nm. Infrared spectra (IR) were recorded as thin film on potassium bromide discs. Nuclear magnetic resonance (NMR) spectra were measured at 300.13 MHz ( $^1\text{H}$ ) or at 75.47 MHz ( $^{13}\text{C}$ ). All chemical shifts were recorded in ppm relative to tetramethylsilane ( $\delta = 0.0$ ). Spin-spin coupling constants ( $J$  value) recorded in Hz were measured directly from the spectra. All reactions were monitored by analytical thin-layer chromatography (TLC) on aluminium-precoated plates of silica gel with detection by spraying with 5% (w/v) dodecamolybdophosphoric acid in ethanol. Silica gel 60 (230–400 mesh) was used for flash chromatography. All reagents and solvents were general reagent grade unless otherwise stated. DMF was dried by magnesium sulfate and filtered. It was then freshly distilled under reduced pressure. THF was freshly distilled from Na/benzophenone ketyl under nitrogen. Dichloromethane was freshly distilled from  $\text{P}_2\text{O}_5$  under nitrogen. Other reagents were purchased from commercial suppliers and were used without purification.

Solvent: CD<sub>3</sub>OD

ppm

6.935  
6.930  
6.926  
6.917  
6.913  
6.908

4.878  
4.737  
4.734  
4.499  
4.482  
4.468  
4.338  
4.306  
3.811  
3.798  
3.779  
3.766  
3.305  
3.300  
3.295

2.061

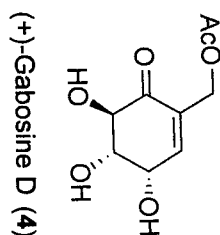

Current Data Parameters  
NAME GL145-h1  
EXPNO 1  
PROCNO 1

F2 - Acquisition Parameters  
Date\_ 20070530

Time 21.18

INSTRUM dpx300

PROBHD 5 mm BB0 BB-1H

PULPROG zg

TD 32768

SOLVENT MeOD

NS 8

DS 0

SWH 5402.485 Hz

FIDRES 0.164871 Hz

AQ 3.0327284 sec

RG 228.1

DW 92.550 usec

DE 132.21 usec

TE 0.0 K

D1 1.00000000 sec

MCREST 0.00000000 sec

MCWRR 0.01500000 sec

===== CHANNEL f1 =====

NUC1 1H

P1 5.00 usec

PL1 -2.00 dB

SFO1 300.1318000 MHz

F2 - Processing parameters

SI 32768

SF 300.1300076 MHz

WDW EM

SSB 0

LB 0.30 Hz

GB 0

PC 1.00

1D NMR plot parameters

CX 22.00 cm

CY 10.38 cm

F1P 8.000 ppm

F1 2401.04 Hz

F2P 1.000 ppm

F2 300.13 Hz

PPMCM 0.31818 ppm/cm

HZCM 95.49591 Hz/cm

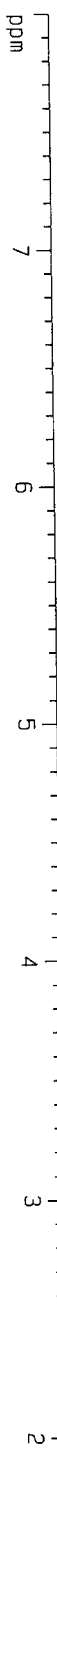

Solvent: CD<sub>3</sub>OD

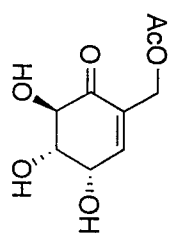

(+)-Gabosine D (4)

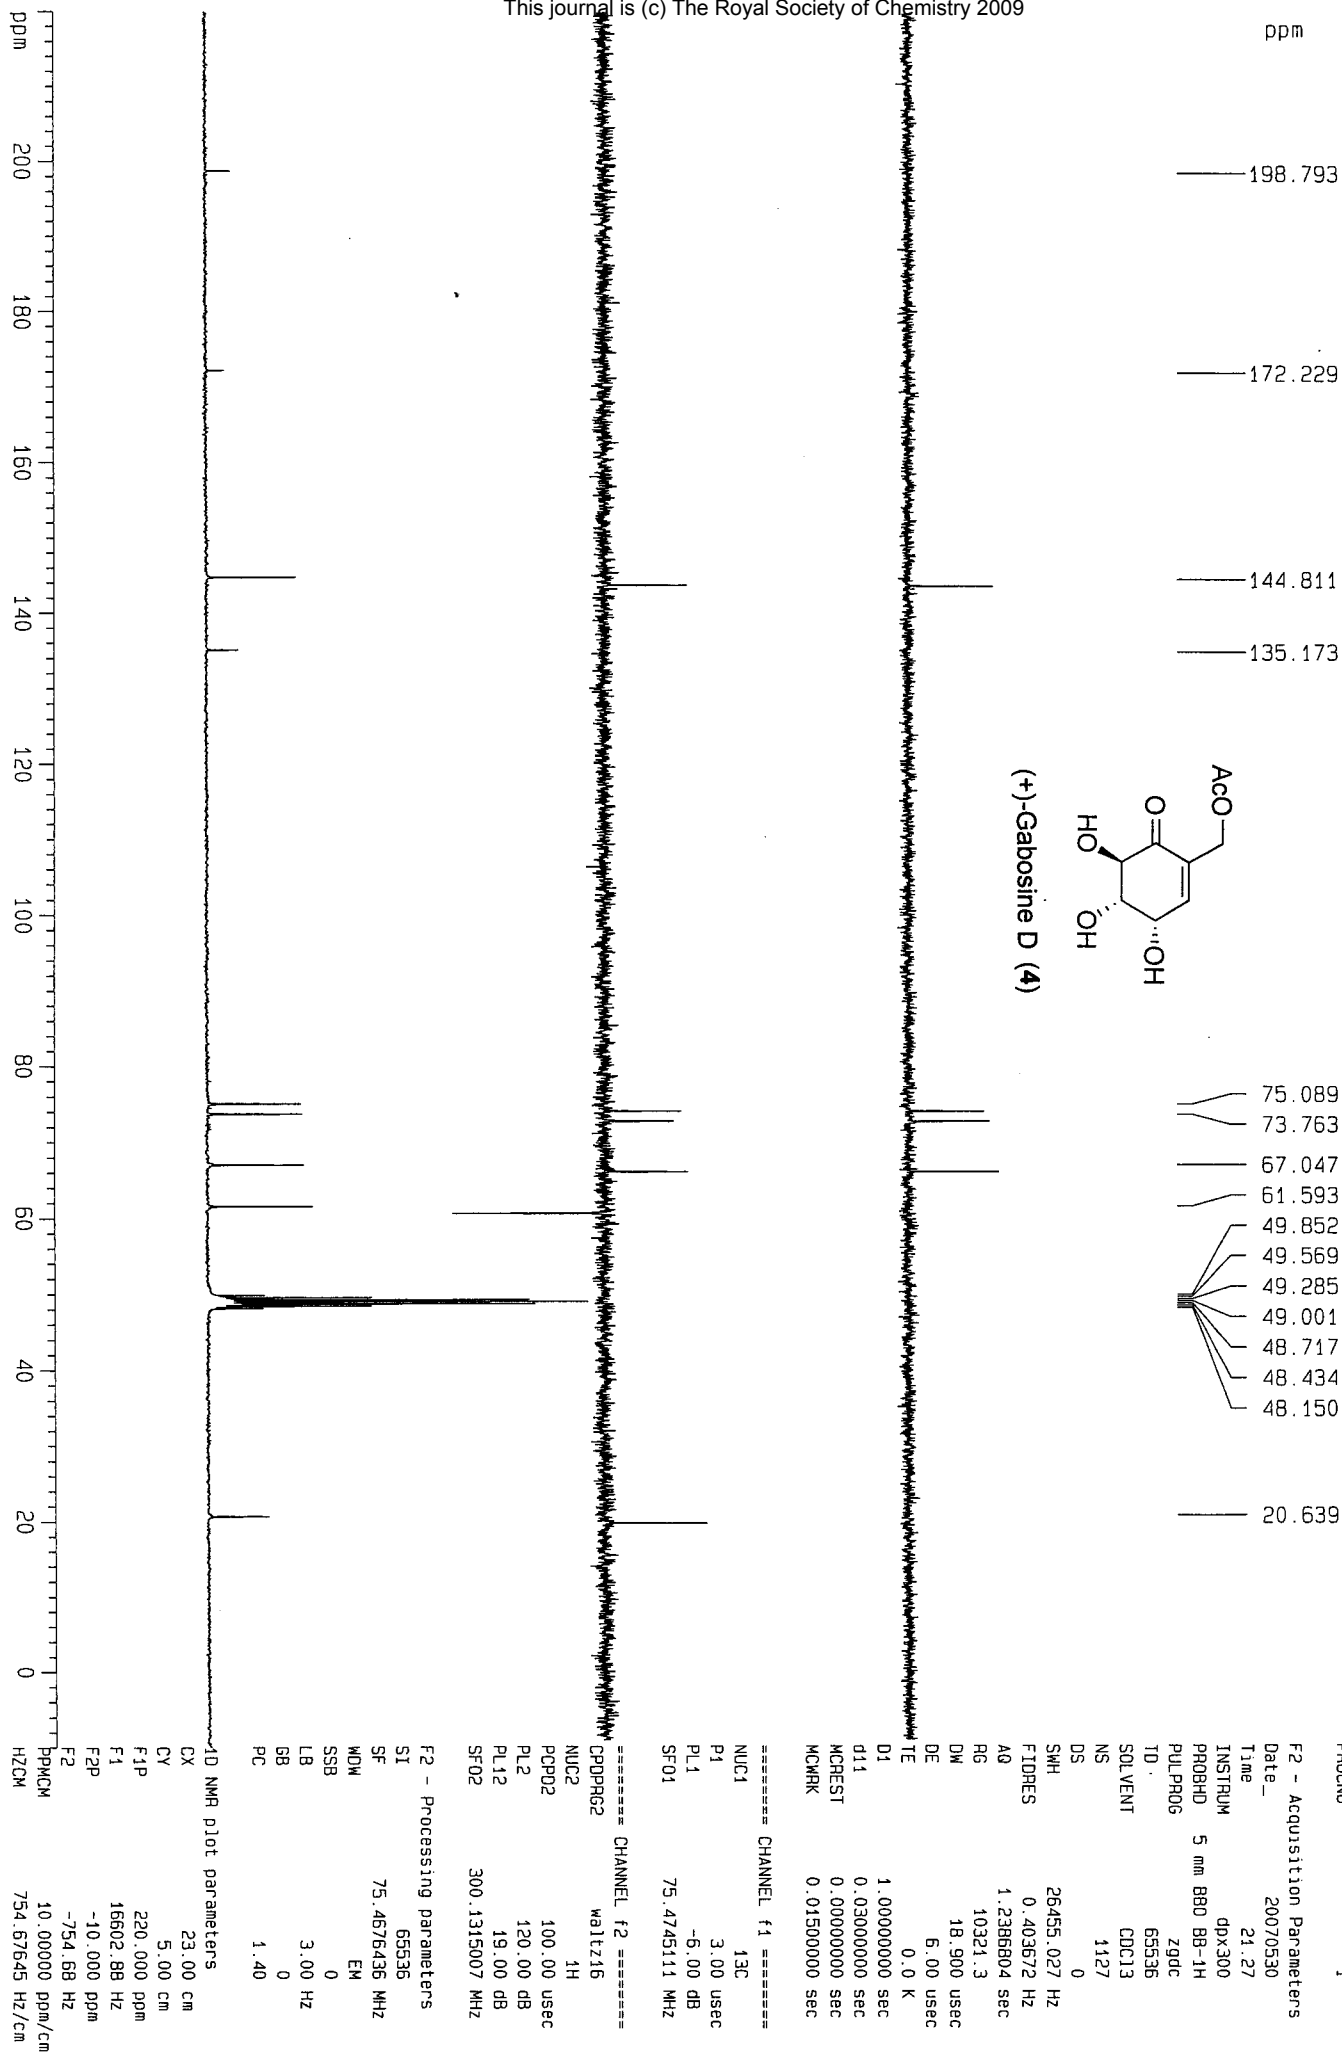

Solvent: CD<sub>3</sub>OD

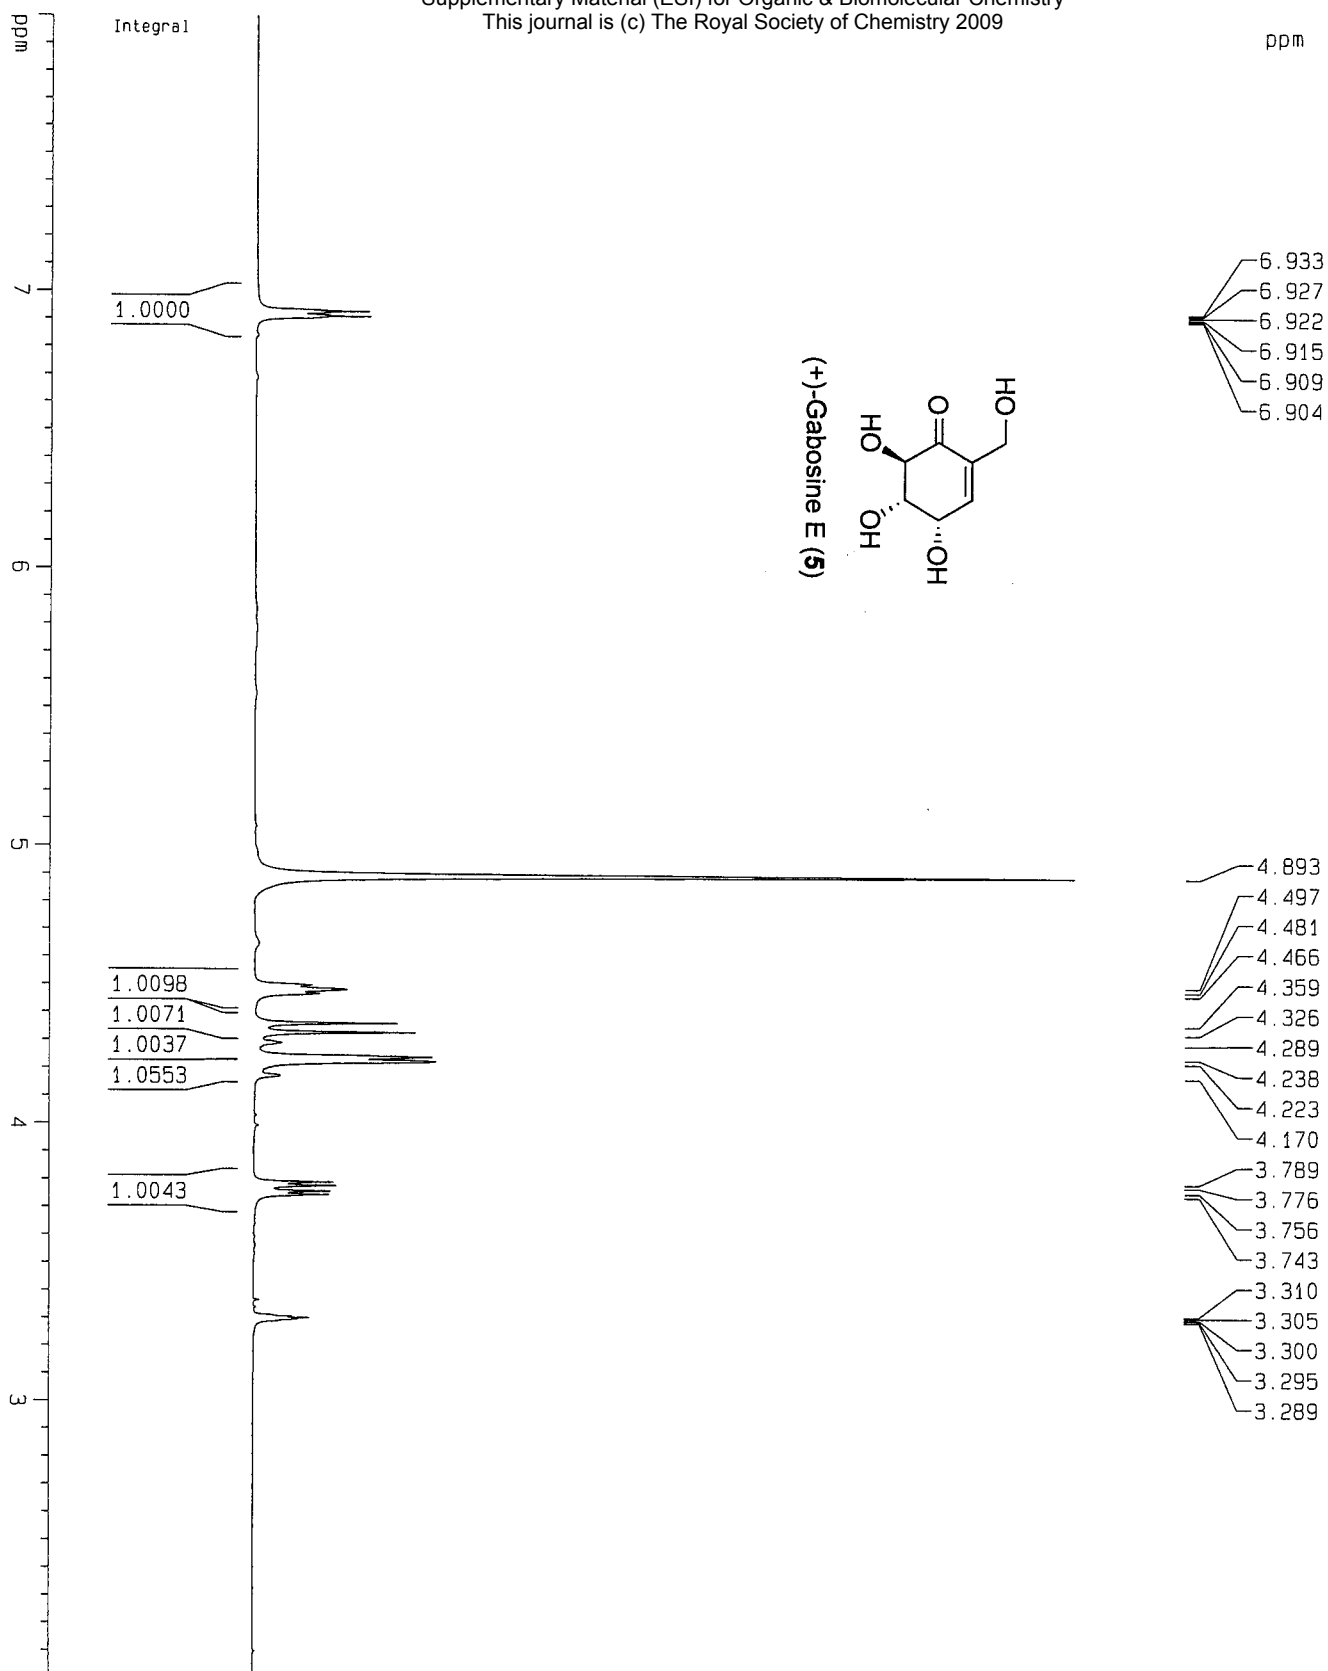

Current Data Parameters  
NAME GL148-h1  
EXPNO 1  
PROCNO 1

F2 - Acquisition Parameters  
Date\_ 20070606  
Time 18.45  
INSTRUM dpx300  
PROBHD 5 mm BBO BB-1H  
PULPROG zg  
TD 32768  
SOLVENT MeOD  
NS 8  
DS 0  
SWH 5402.485 Hz  
FIDRES 0.164871 Hz  
AQ 3.0327284 sec  
RG 181  
DW 92.550 usec  
DE 132.21 usec  
TE 0.0 K  
D1 1.00000000 sec  
MCREST 0.00000000 sec  
MCWRK 0.01500000 sec

===== CHANNEL f1 =====  
NUC1 1H  
P1 5.00 usec  
PL1 -2.00 dB  
SFO1 300.1318000 MHz

F2 - Processing parameters  
SI 32768  
SF 300.1300076 MHz  
WDW EM  
SSB 0  
LB 0.50 Hz  
GB 0  
PC 1.00

1D NMR plot parameters  
CX 22.00 cm  
CY 10.75 cm  
F1P 8.000 ppm  
F1 2401.04 Hz  
F2P 2.000 ppm  
F2 600.26 Hz  
PPMCM 0.27273 ppm/cm  
HZCM 81.85364 Hz/cm

Solvent: CD<sub>3</sub>OD

(+)-Gabosine E (5)

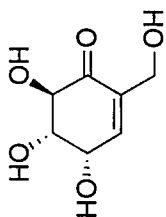

ppm

199.676

141.835

139.931

75.145

73.894

67.090

59.472

49.852

49.568

49.284

49.000

48.716

48.432

48.148

Current Data Parameters  
NAME GL148-c13  
EXPNO 1  
PROCNO 1

F2 - Acquisition Parameters  
Date\_ 20070606

Time 18.52  
INSTRUM dpx300  
PROBHD 5 mm BBO BB-1H  
PULPROG zgpg30  
TD 65536  
SOLVENT CDCl3  
NS 140  
DS 0  
SWH 26455.027 Hz  
FIDRES 0.403672 Hz  
AQ 1.236804 sec  
RG 5792.6  
DW 18.900 usec  
DE 6.00 usec  
TE 0.0 K  
D1 1.00000000 sec  
d11 0.03000000 sec  
MCREST 0.00000000 sec  
MCWAK 0.01500000 sec

===== CHANNEL f1 =====  
NUC1 13C  
P1 3.00 usec  
PL1 -6.00 dB  
SF01 75.4745111 MHz

===== CHANNEL f2 =====  
CPDPRG2 waltz16  
NUC2 1H  
PCPD2 100.00 usec  
PL2 120.00 dB  
PL12 19.00 dB  
SF02 300.1315007 MHz

F2 - Processing parameters  
SI 65536  
SF 75.4676448 MHz  
WDW EM  
SSB 0  
LB 2.50 Hz  
GB 0  
PC 1.40

1D NMR plot parameters

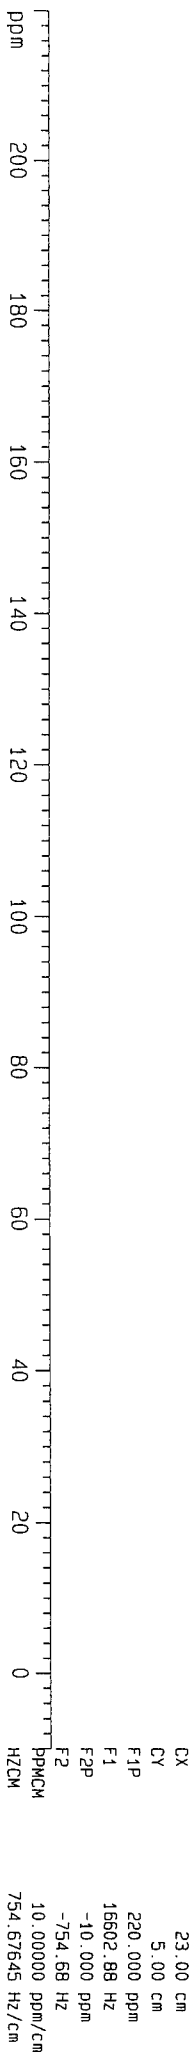

Solvent: CD<sub>3</sub>OD

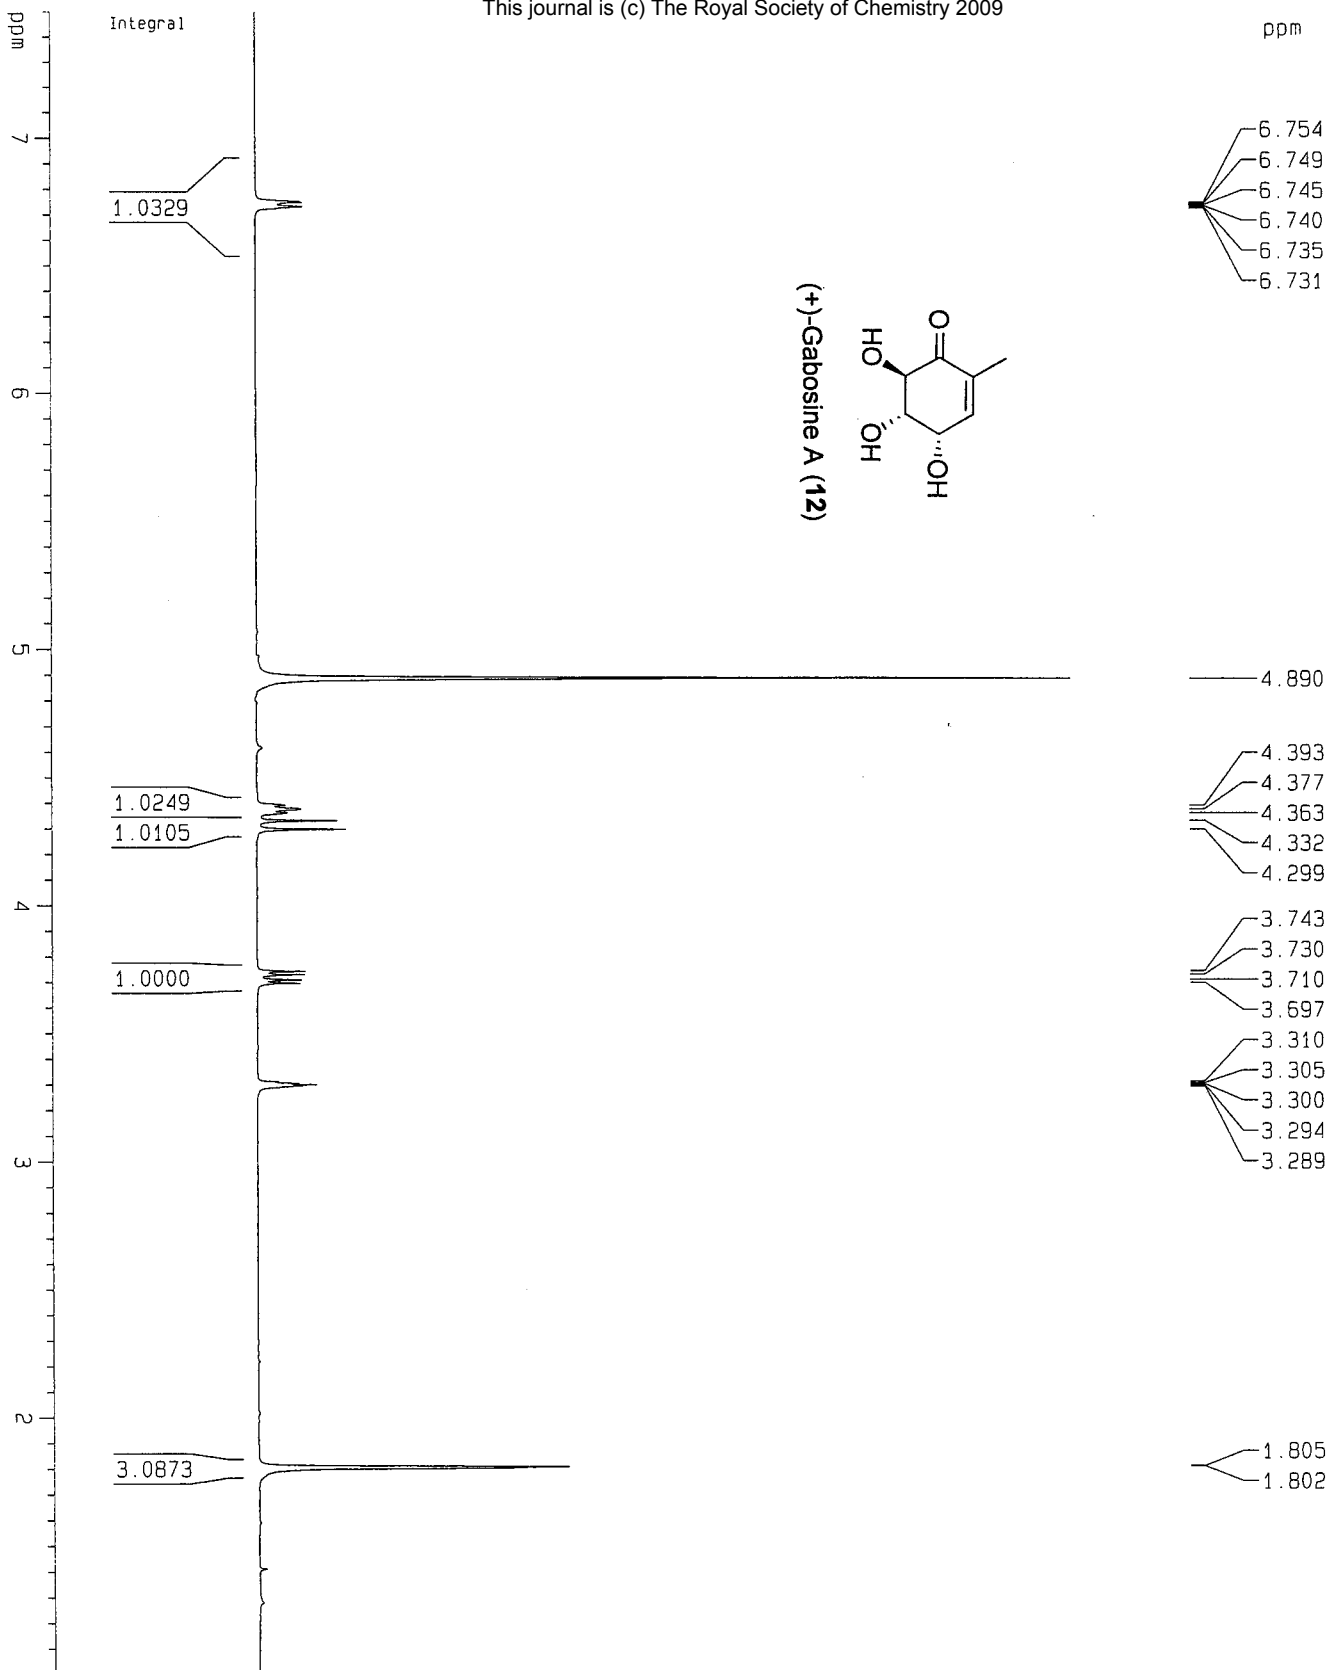

Current Data Parameters  
NAME GL154-h1  
EXPNO 1  
PROCNO 1

F2 - Acquisition Parameters  
Date\_ 20070709  
Time 10.17

INSTRUM dpX300  
PROBHD 5 mm BBO BB-1H  
PULPROG zg

TD 32768  
SOLVENT MeOD

NS 8  
DS 0

SWH 5402.485 Hz  
FIDRES 0.164871 Hz  
AQ 3.0327284 sec

RG 228.1  
DE 92.550 usec  
TE 0.0 K

D1 1.00000000 sec  
MCREST 0.00000000 sec  
MCNMRK 0.01500000 sec

===== CHANNEL f1 =====  
NUC1 1H  
P1 5.00 usec  
PL1 -2.00 dB  
SF01 300.1318000 MHz

F2 - Processing Parameters  
SI 32768  
SF 300.1300078 MHz  
WDW EM  
SSB 0  
LB 0.50 Hz  
GB 0  
PC 1.00

1D NMR plot parameters  
CX 22.00 cm  
CY 10.66 cm  
F1P 7.500 ppm  
F1 2250.98 Hz  
F2P 1.000 ppm  
F2 300.13 Hz  
PPMCM 0.29545 ppm/cm  
HZCM 88.67478 Hz/cm





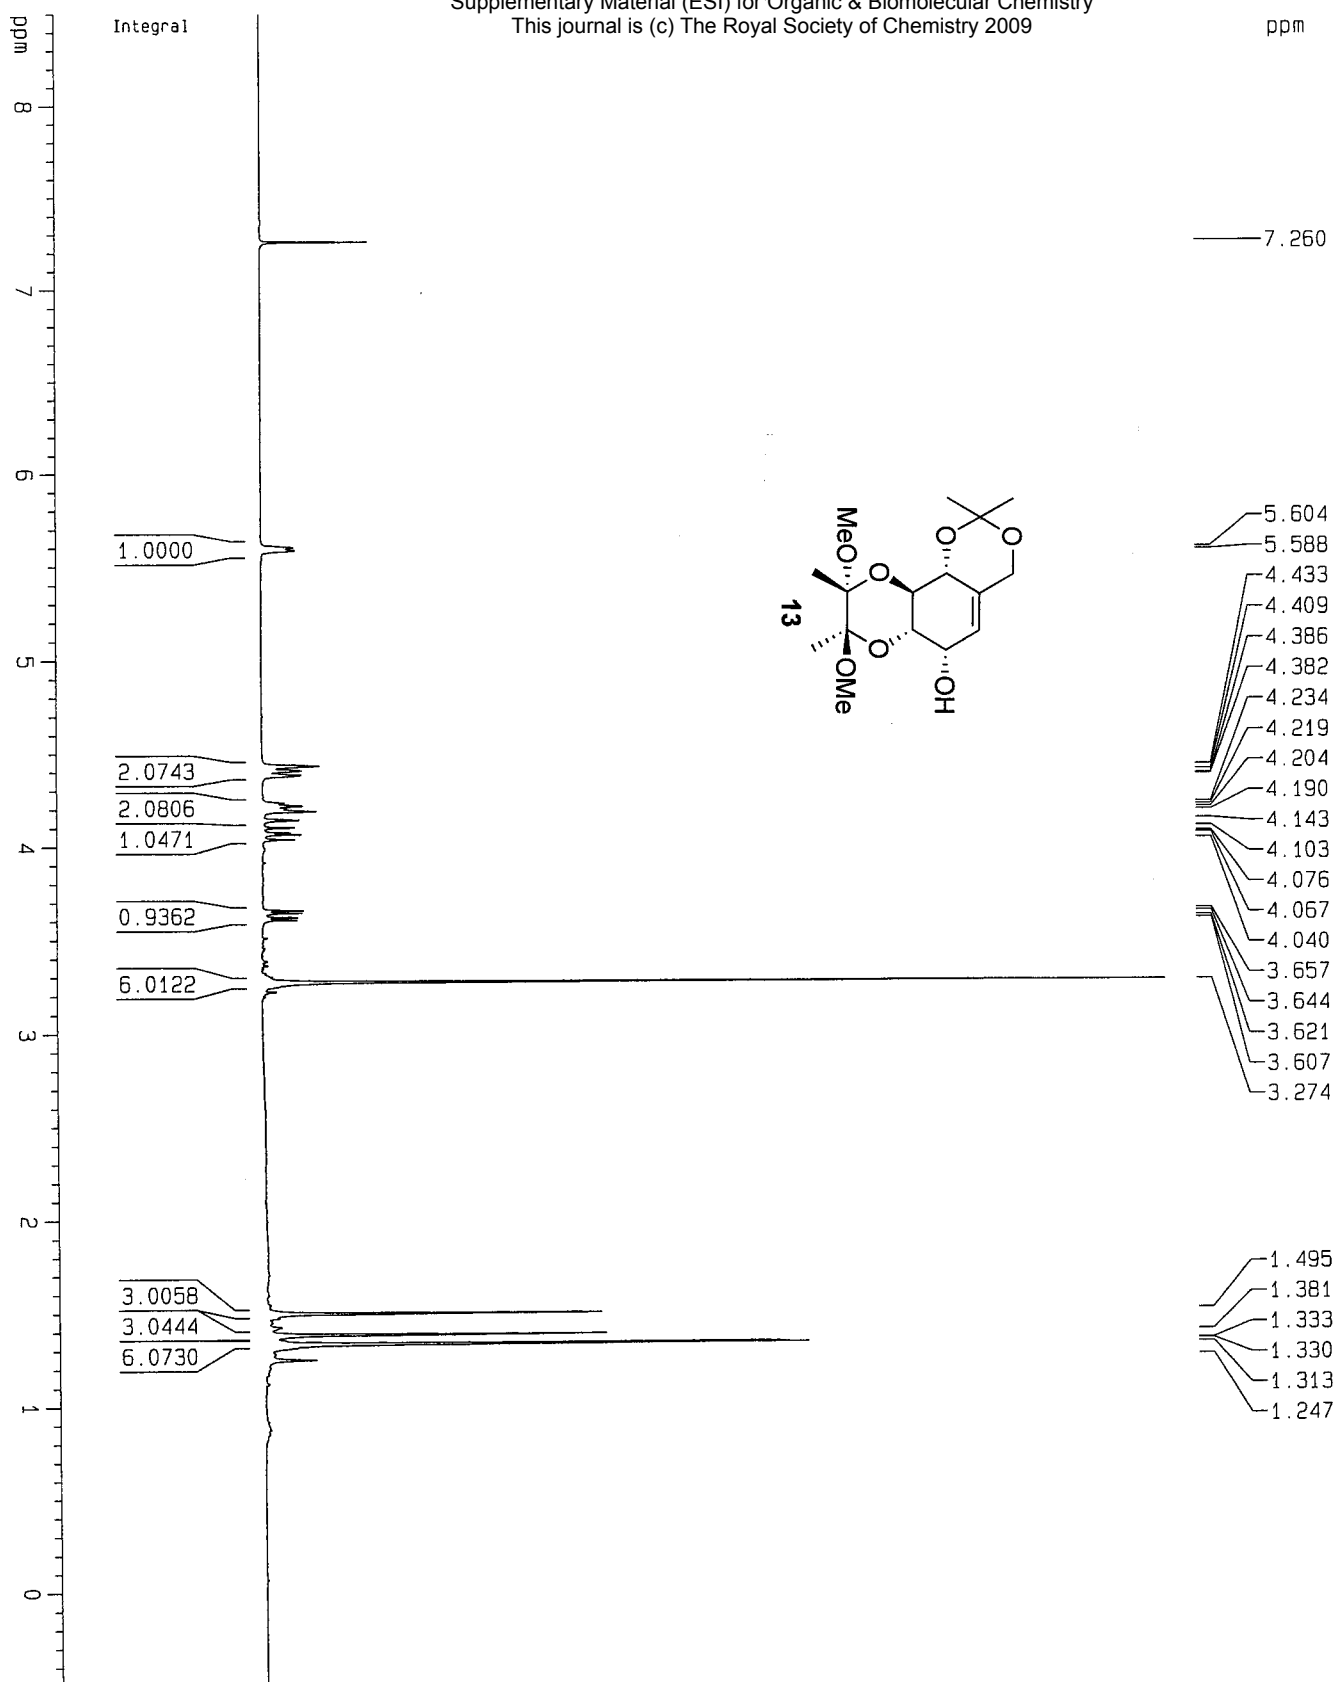

```

F2 - Acquisition Parameters
Date_      20050521

```

INSTIRUM      0px300

|         |       |
|---------|-------|
| PULPHUS | 29    |
| ID      | 33768 |

CONV. NS

|        |          |
|--------|----------|
| SMH    | B592.806 |
| CIDRRC | 0 37443D |

|    |     |
|----|-----|
| RG | 181 |
| EL | 200 |

TE 296.2

2000

|      |     |
|------|-----|
| NOCl | 17  |
| PA   | 500 |

32/bi  
300 470055

MDM

68

|    |      |
|----|------|
| CX | 22.0 |
|----|------|

F.1p 8.20

F2 -150.0

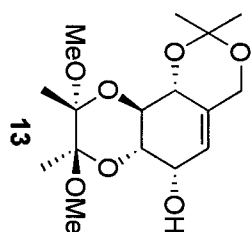

ppm

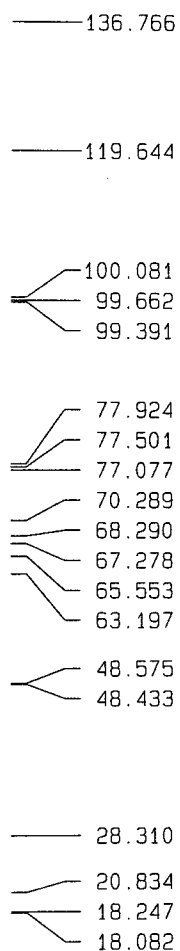

Current Data Parameters  
NAME GL44c13  
EXPNO 1  
PROCNO 2

F2 - Acquisition Parameters  
Date\_ 20050520

Time 11.31  
INSTRUM dpx300  
PROBHD 5 mm BBO BB-1H  
PULPROG zgpg30  
TD 65536  
SOLVENT CDCl3  
NS 882  
DS 0  
SWH 26455.027 Hz  
FIDRES 0.403672 Hz  
AQ 1.2386804 sec  
RG 2896.3  
DW 18.900 usec  
DE 6.00 usec  
TE 297.2 K  
D1 1.00000000 sec  
d11 0.03000000 sec  
MCREST 0.00000000 sec  
MCWRK 0.01500000 sec

===== CHANNEL f1 =====  
NUC1 13C  
P1 3.00 usec  
PL1 -6.00 dB  
SFO1 75.4745111 MHz

===== CHANNEL f2 =====  
CQPPRG2 waltz16  
NUC2 1H  
PCPD2 100.00 usec  
PL2 120.00 dB  
PL12 19.00 dB  
SFO2 300.1315007 MHz

F2 - Processing Parameters  
SI 65536  
SF 75.4677141 MHz  
WDW EM  
SSB 0  
LB 3.00 Hz  
GB 0  
PC 1.40

1D NMR plot parameters

CX 23.00 cm  
CY 4.00 cm  
F1P 220.000 ppm  
F1 16602.90 Hz  
F2P -10.000 ppm  
F2 -754.68 Hz  
PPMCM 10.00000 ppm/cm  
HZCM 754.67712 Hz/cm

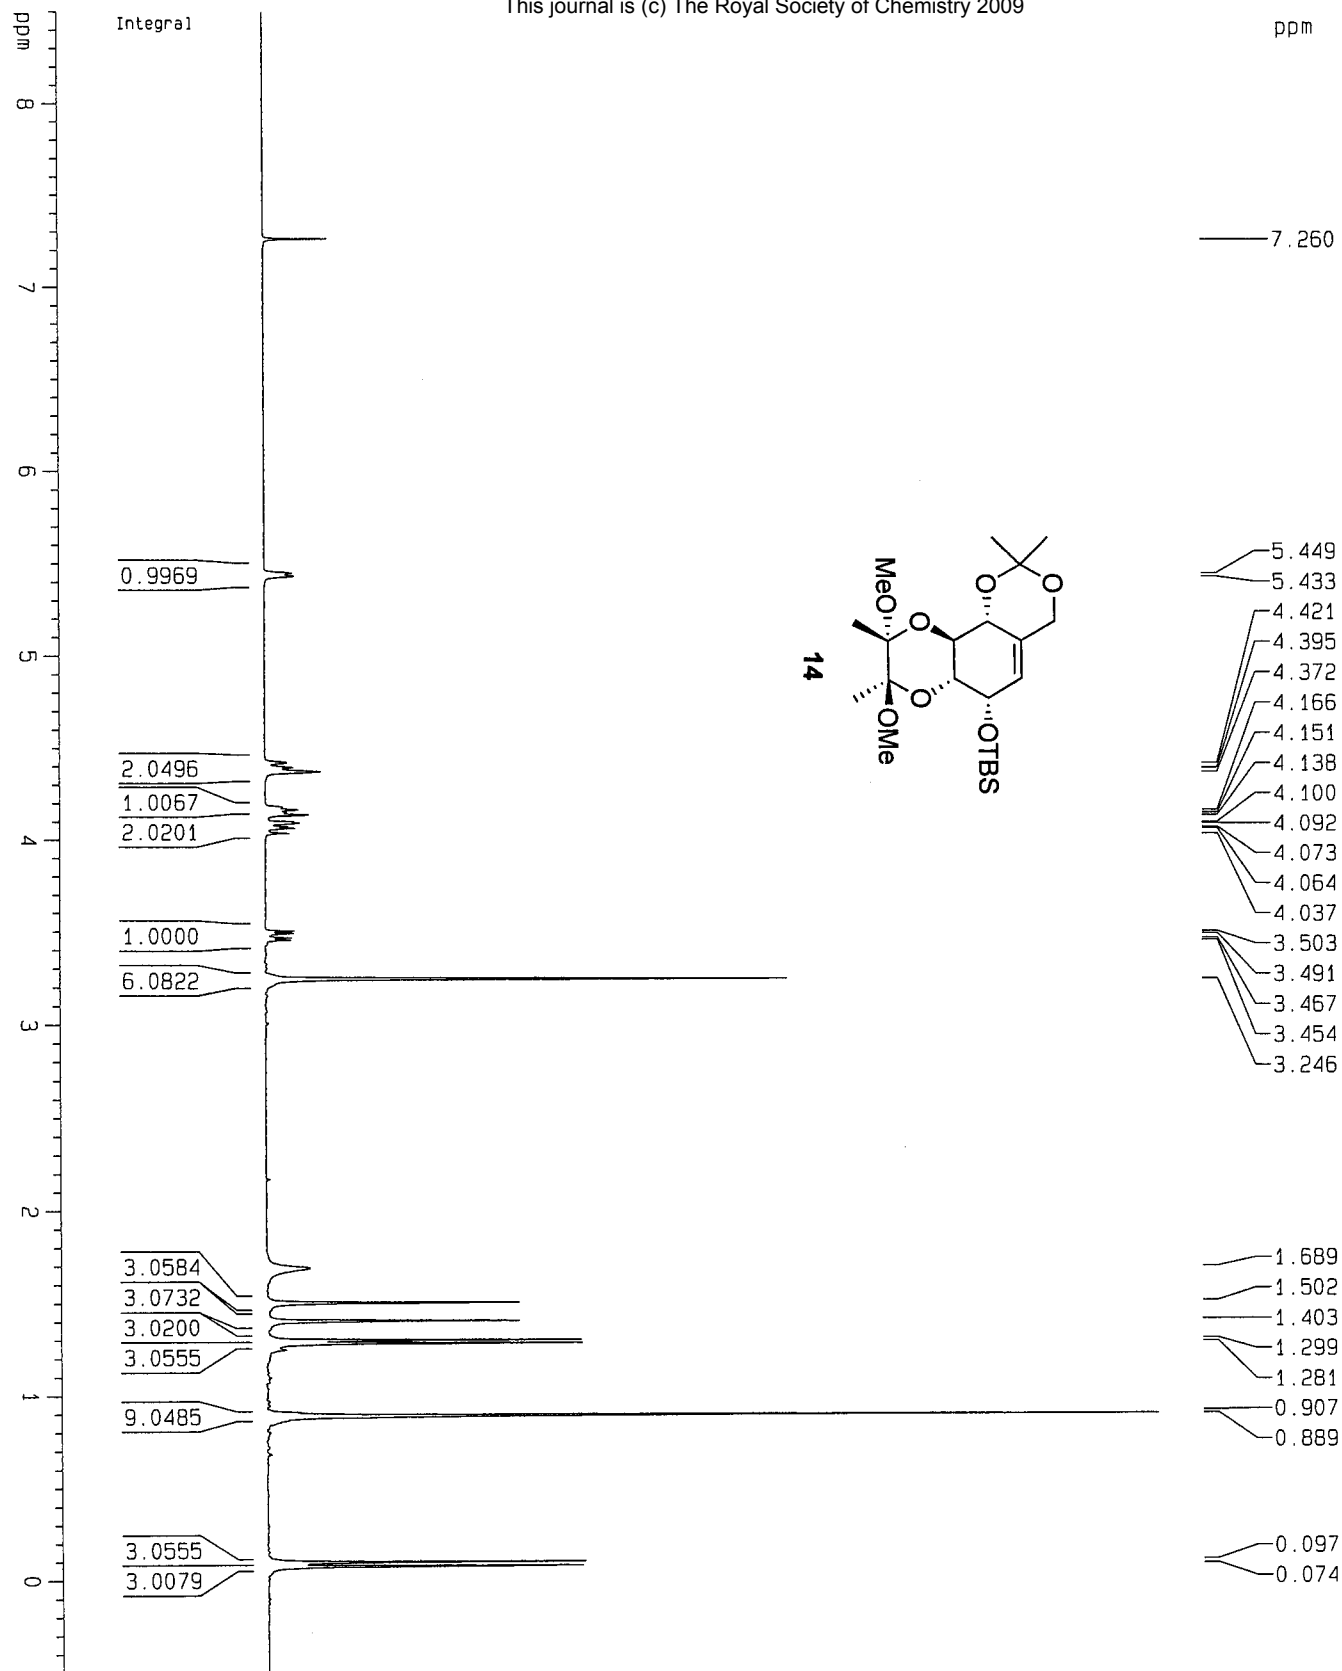

Current Data Parameters  
NAME GL141-h1  
EXPNO 1  
PROCNO 1

F2 - Acquisition Parameters  
Date\_ 20070521  
Time 11.14  
INSTRUM dpx300  
PROBHD 5 mm BBO BB-1H  
PULPROG zg  
TD 32768  
SOLVENT CDCl3  
NS 8  
DS 0  
SWH 4803.074 Hz  
FIDRES 0.146578 Hz  
AQ 3.4111989 sec  
RG 128  
DM 104.100 usec  
DE 148.71 usec  
TE 0.0 K  
D1 1.00000000 sec  
MCREST 0.00000000 sec  
MCWPK 0.01500000 sec

===== CHANNEL f1 =====  
NUC1 1H  
P1 5.00 usec  
PL1 -2.00 dB  
SF01 300.1318000 MHz

F2 - Processing parameters  
SI 32768  
SF 300.1300060 MHz  
WDW EM  
SSB 0  
LB 0.50 Hz  
GB 0  
PC 1.00

1D NMR plot parameters  
CX 22.00 cm  
CY 11.64 cm  
F1P 8.500 ppm  
F1 2551.10 Hz  
F2P -0.500 ppm  
F2 -150.07 Hz  
PPMCM 0.40909 ppm/cm  
HZCM 122.78046 Hz/cm

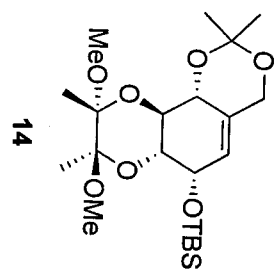

ppm

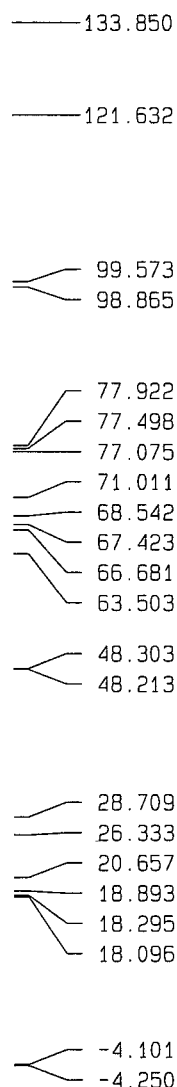

Current Data Parameters  
NAME GL141-c13  
EXPNO 1  
PROCNO 1

F2 - Acquisition Parameters  
Date\_ 20070521  
Time 11:21

INSTRUM dp300  
PROBHD 5 mm BBO BB-1H  
PULPROG zgpg  
TD 65536  
SOLVENT CDCl3  
NS 335  
DS 0  
SWH 26455.027 Hz  
FIDRES 0.403672 Hz  
AQ 1.2386804 sec  
RG 5792.6  
DM 18.900 usec  
DE 6.00 usec  
TE 0.0 K  
D1 1.00000000 sec  
d11 0.03000000 sec  
MCREST 0.00000000 sec  
MCWPK 0.01500000 sec

===== CHANNEL f1 =====  
NUC1 13C  
P1 3.00 usec  
PL1 -6.00 dB  
SF01 75.474511 MHz

===== CHANNEL f2 =====  
CQPRG2 waltz16  
NUC2 1H  
PCPD2 100.00 usec  
PL2 120.00 dB  
PL12 19.00 dB  
SF02 300.1315007 MHz

F2 - Processing parameters  
SI 65536  
SF 75.4677129 MHz  
WDW EM  
SSB 0  
LB 2.00 Hz  
GB 0  
PC 1.40

ID NMR plot parameters

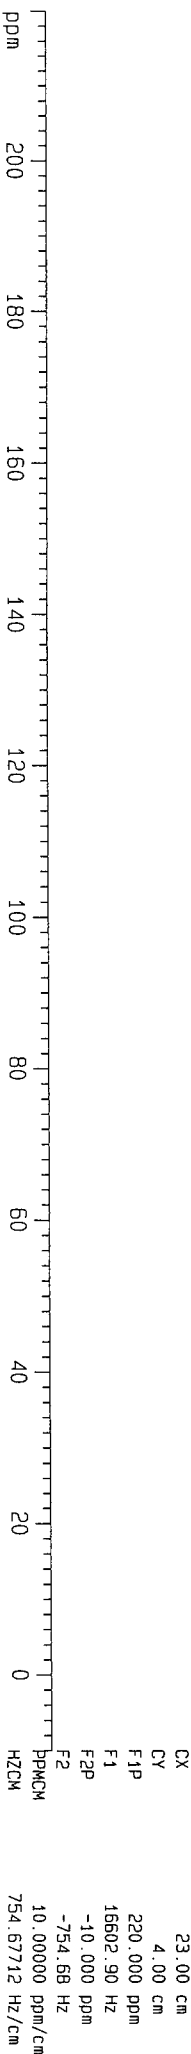

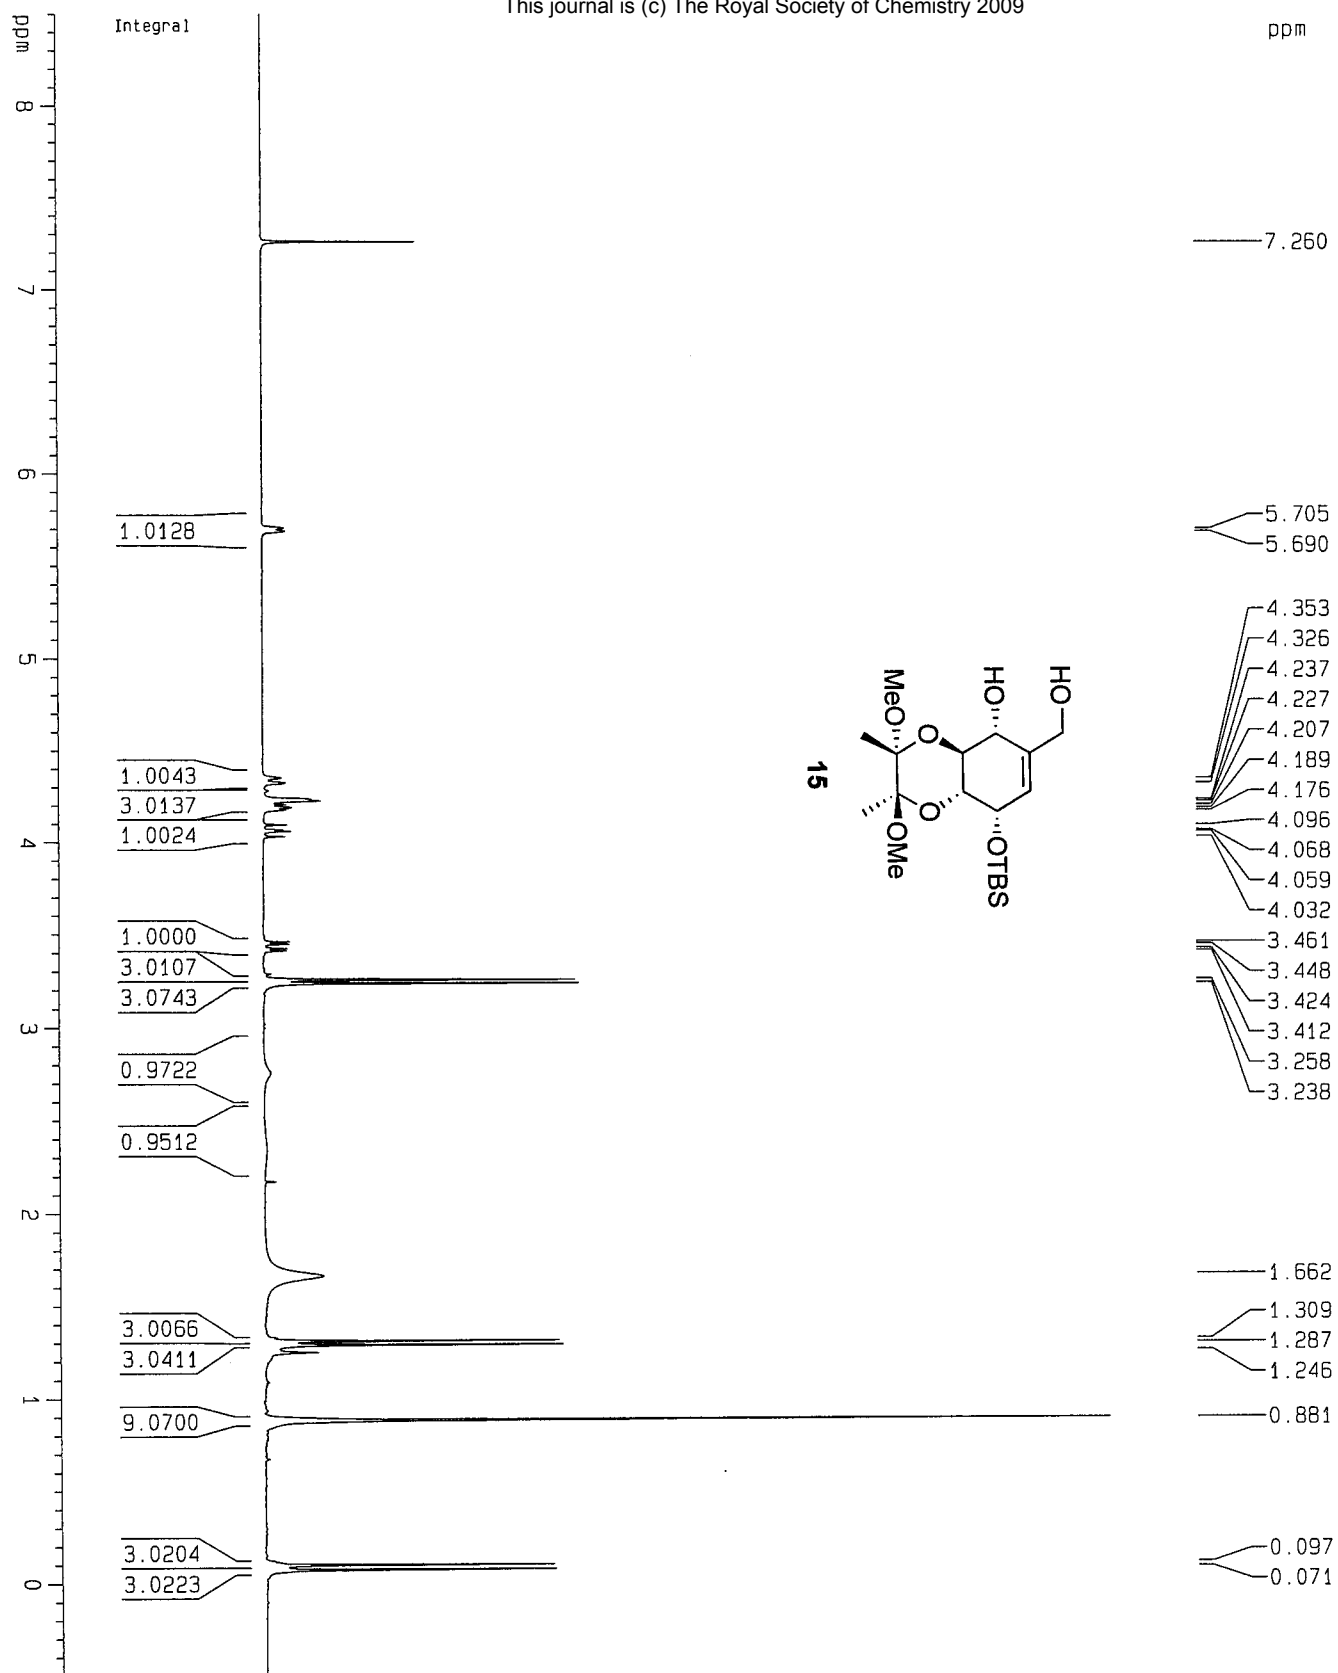

Current Data Parameters

|        |          |
|--------|----------|
| NAME   | GL142-h1 |
| EXPNO  | 1        |
| PROCNO | 1        |

F2 - Acquisition Parameters

|         |                |
|---------|----------------|
| Date_   | 20070523       |
| Time    | 16.02          |
| INSTRUM | dpX300         |
| PROBHD  | 5 mm BB0 BB-1H |
| PULPROG | zg             |
| TD      | 32768          |
| SOLVENT | CDCl3          |
| NS      | 16             |
| DS      | 0              |
| SWH     | 4803.074 Hz    |
| FIDRES  | 0.146578 Hz    |
| AQ      | 3.411989 sec   |
| RG      | 362            |
| DW      | 104.100 usec   |
| DE      | 148.71 usec    |
| TE      | 0.0 K          |
| D1      | 1.00000000 sec |
| MCREST  | 0.00000000 sec |
| MCWRK   | 0.01500000 sec |

===== CHANNEL f1 =====

|      |                 |
|------|-----------------|
| NUC1 | <sup>1</sup> H  |
| P1   | 5.00 usec       |
| PL1  | -2.00 dB        |
| SFO1 | 300.1318000 MHz |

F2 - Processing parameters

|     |                |
|-----|----------------|
| SI  | 32768          |
| SF  | 300.130063 MHz |
| WDW | EM             |
| SSB | 0              |
| LB  | 0.50 Hz        |
| GB  | 0              |
| PC  | 1.00           |

1D NMR plot parameters

|       |                 |
|-------|-----------------|
| CX    | 22.00 cm        |
| CY    | 11.09 cm        |
| F1P   | 8.500 ppm       |
| F1    | 2551.10 Hz      |
| F2P   | -0.500 ppm      |
| F2    | -150.07 Hz      |
| PPMCM | 0.40909 ppm/cm  |
| HZCM  | 122.78046 Hz/cm |

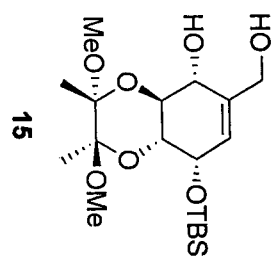

ppm

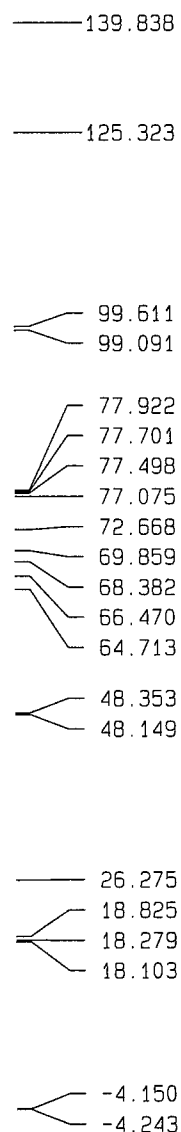

Current Data Parameters  
NAME GL142-c13  
EXPNO 1  
PROCNO 1

F2 - Acquisition Parameters  
Date\_ 20070523

Time 16.50  
INSTRUM dpx300  
PROBHD 5 mm BBO BB-1H  
PULPROG zgpg30  
TD 65536  
SOLVENT CDCl3  
NS 1230  
DS 0  
SWH 26455.027 Hz  
FIDRES 0.403672 Hz  
AQ 1.2386804 sec  
RG 5792.6  
DM 18.900 usec  
DE 6.00 usec  
TE 0.0 K  
D1 1.00000000 sec  
d11 0.03000000 sec  
MCREST 0.00000000 sec  
MCMRK 0.01500000 sec

===== CHANNEL f1 =====  
NUC1 13C  
P1 3.00 usec  
PL1 -6.00 dB  
SF01 75.4745111 MHz

===== CHANNEL f2 =====  
CPDPRG2 waltz16  
NUC2 1H  
PCPD2 100.00 usec  
PL2 120.00 dB  
PL12 19.00 dB  
SF02 300.1315007 MHz

F2 - Processing parameters  
SI 65536  
SF 75.4677129 MHz  
WDW EM  
SSB 0  
LB 2.00 Hz  
GB 0  
PC 1.40

1D NMR plot parameters

CX 23.00 cm  
CY 5.00 cm  
F1P 220.000 ppm  
F1 16602.90 Hz  
F2P -10.000 ppm  
F2 -754.68 Hz  
PPMCM 10.00000 ppm/cm  
HZCM 754.67712 Hz/cm

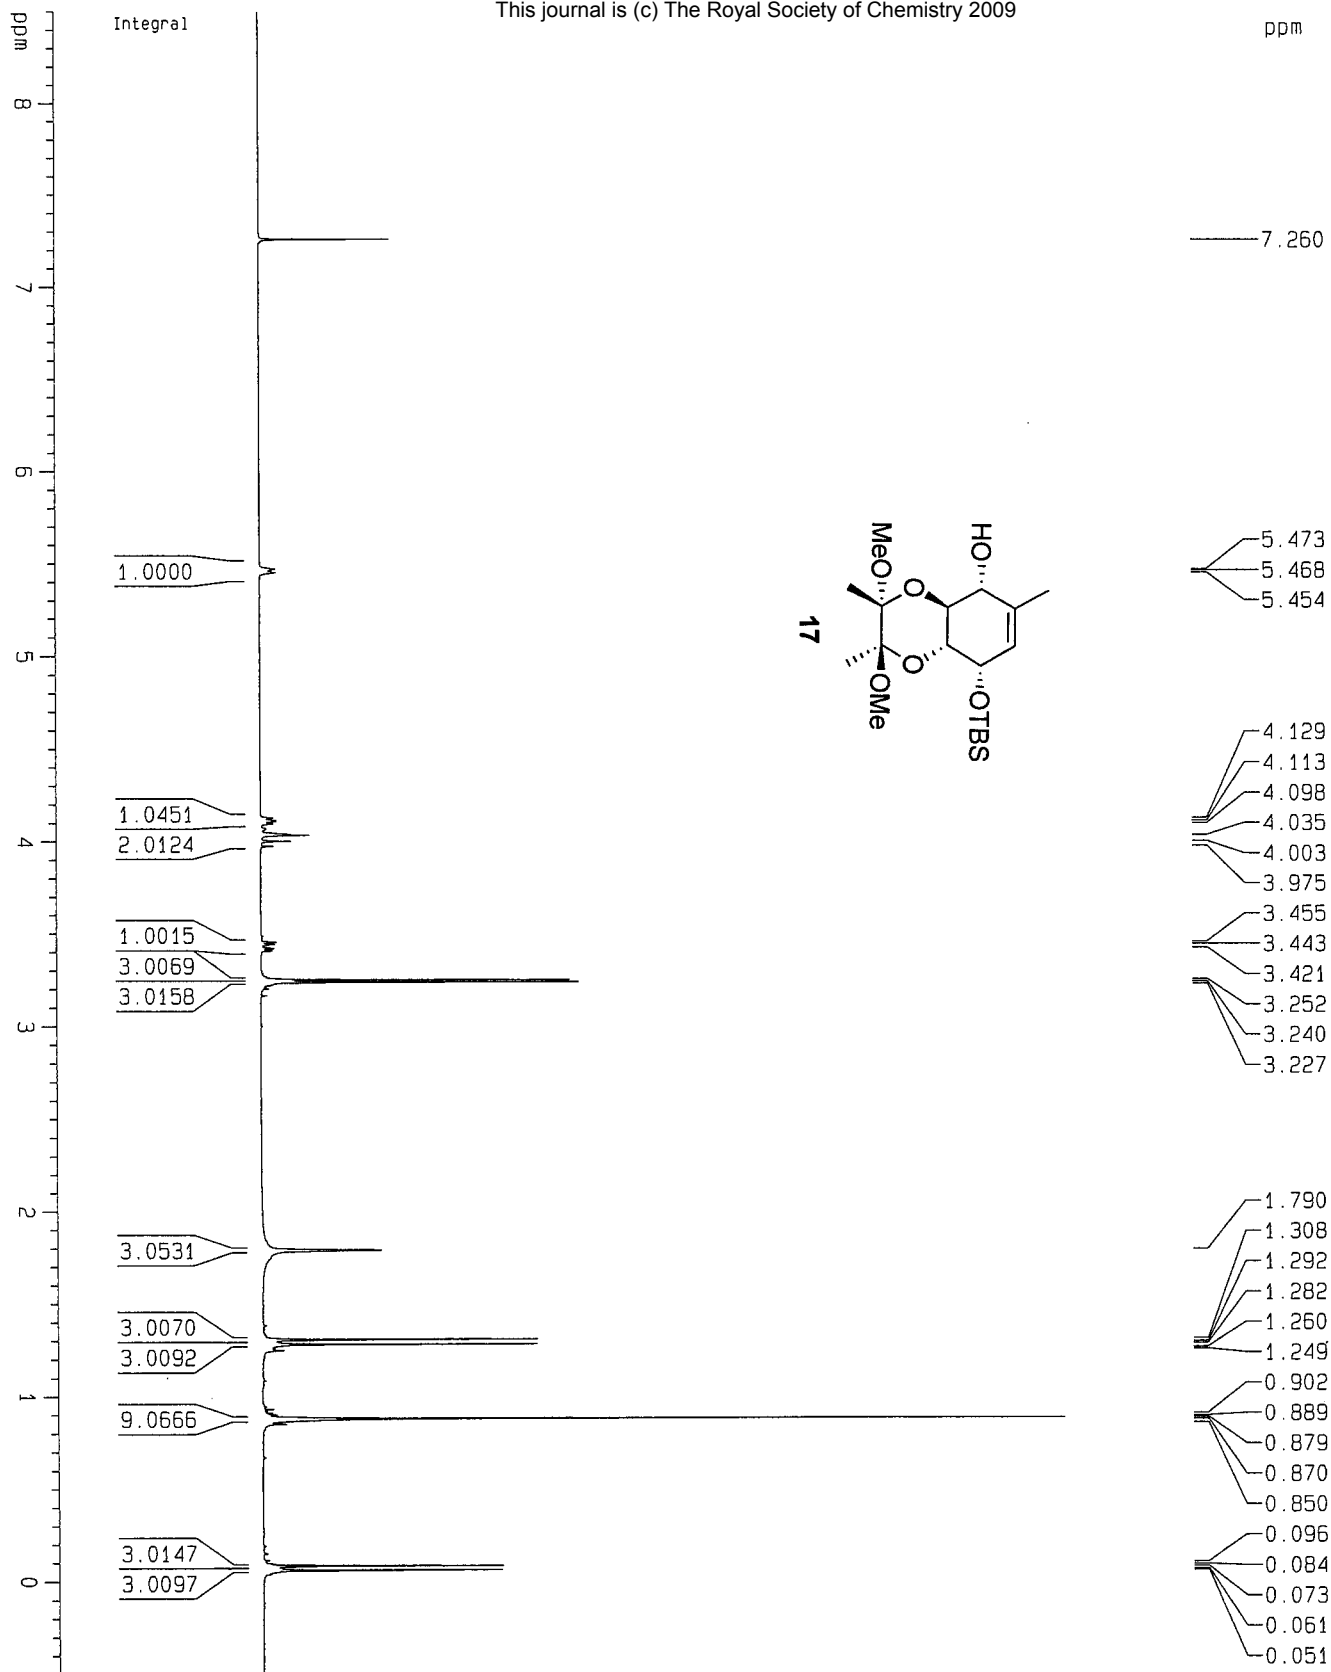

| Current Data Parameters     |                 |
|-----------------------------|-----------------|
| NAME                        | GL1521-h1       |
| EXPNO                       | 1               |
| PROCNO                      | 1               |
| F2 - Acquisition Parameters |                 |
| Date_                       | 20070608        |
| Time                        | 18.12           |
| INSTRUM                     | dpX300          |
| PROBHD                      | 5 mm BBO BB-1H  |
| PULPROG                     | zg              |
| TD                          | 32768           |
| SOLVENT                     | CDC13           |
| NS                          | 32              |
| DS                          | 0               |
| SWH                         | 5402.485 Hz     |
| FIDRES                      | 0.164871 Hz     |
| AQ                          | 3.0327284 sec   |
| RG                          | 362             |
| DM                          | 92.550 usec     |
| DE                          | 132.21 usec     |
| TE                          | 0.0 K           |
| D1                          | 1.00000000 sec  |
| MCREST                      | 0.00000000 sec  |
| MCWK                        | 0.01500000 sec  |
| ===== CHANNEL f1 =====      |                 |
| NUC1                        | 1H              |
| P1                          | 5.00 usec       |
| PL1                         | -2.00 dB        |
| SFO1                        | 300.1318000 MHz |
| F2 - Processing parameters  |                 |
| SI                          | 32768           |
| SF                          | 300.1300064 MHz |
| MWM                         | EM              |
| SSB                         | 0               |
| LB                          | 0.30 Hz         |
| GB                          | 0               |
| PC                          | 1.00            |
| 1D NMR plot parameters      |                 |
| CX                          | 22.00 cm        |
| CY                          | 10.62 cm        |
| F1P                         | 8.500 ppm       |
| F1                          | 2551.10 Hz      |
| F2P                         | -0.500 ppm      |
| F2                          | -150.07 Hz      |
| PPMCM                       | 0.40909 ppm/cm  |
| HZCM                        | 122.78046 Hz/cm |

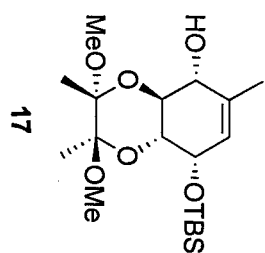

ppm

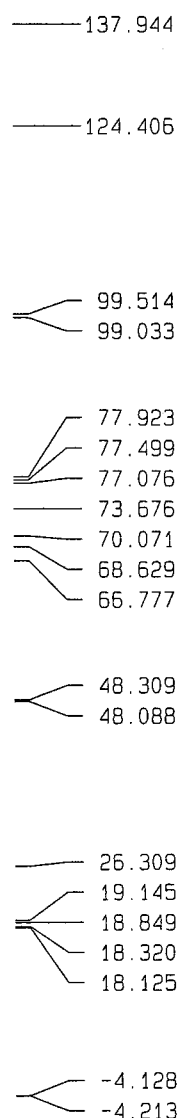

Current Data Parameters  
NAME GL152-c13  
EXPNO 1  
PROCNO 1

F2 - Acquisition Parameters  
Date\_ 20070604  
Time 19.09

INSTRUM dpx300  
PROBHD 5 mm BBO BB-1H  
PULPROG zgpg

TD 65536  
SOLVENT CDCl3  
NS 880

DS 0  
SWH 26455.027 Hz  
FIDRES 0.403672 Hz

AQ 1.2386804 sec  
RG 2560.3  
DM 18.900 usec

DE 5.00 usec  
TE 0.0 K

D1 1.00000000 sec  
d11 0.03000000 sec  
MCREST 0.00000000 sec

MCNMRK 0.01500000 sec

===== CHANNEL f1 =====  
NUC1 13C  
P1 3.00 usec  
PL1 -6.00 dB

SFO1 75.4745111 MHz

===== CHANNEL f2 =====  
CPDPRG2 waltz16  
NUC2 1H  
PCPD2 100.00 usec

PL2 120.00 dB  
PL12 19.00 dB  
SFO2 300.1315007 MHz

F2 - Processing parameters  
SI 65536  
SF 75.4677125 MHz

WDW EM  
SSB 0  
LB 2.50 Hz

GB 0  
PC 1.40

===== 1D NMR plot parameters =====  
CX 23.00 cm  
CY 3.50 cm

F1P 220.000 ppm  
F1 16602.90 Hz  
F2P -10.000 ppm

F2 -754.68 Hz  
PPMCM 10.00000 ppm/cm  
HZCM 754.67712 Hz/cm



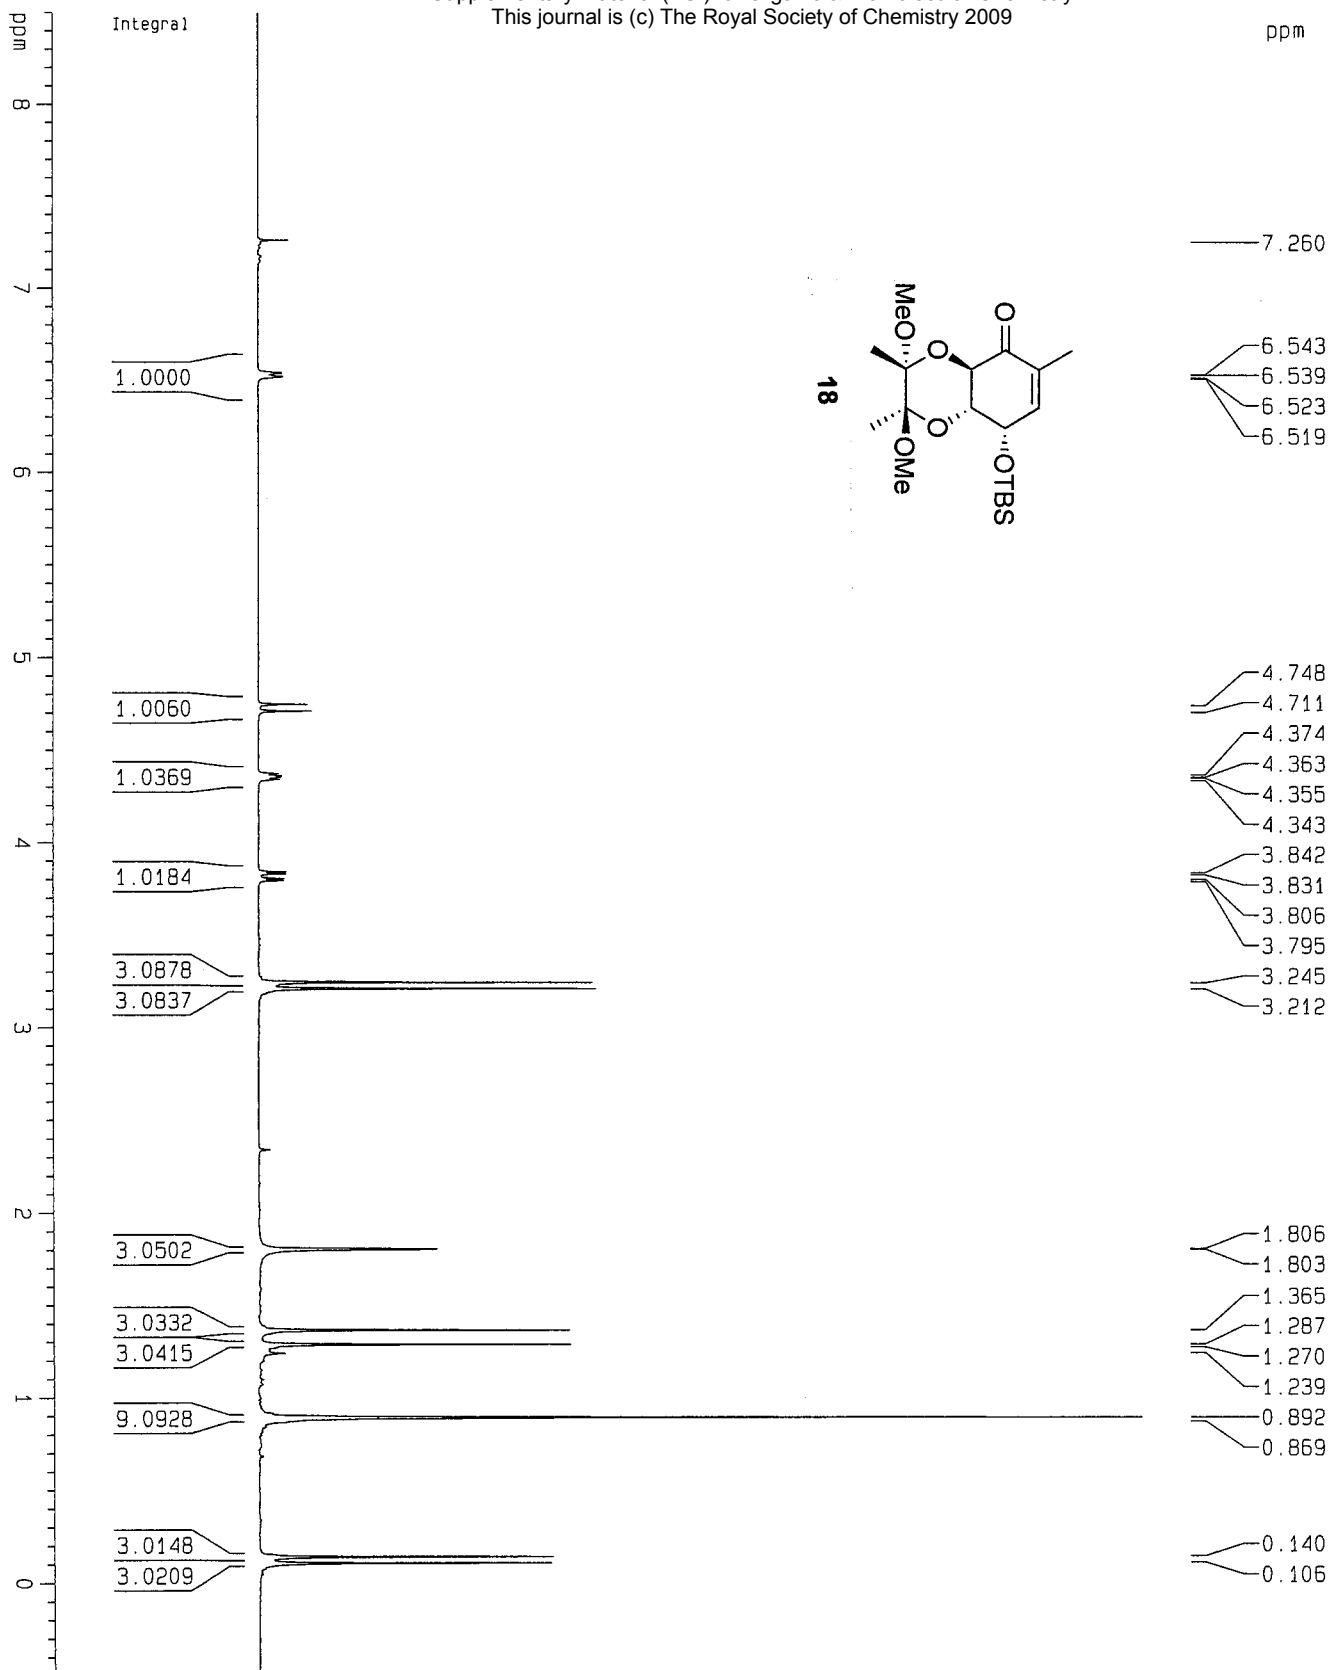

Current Data Parameters  
NAME GL153-h1  
EXPNO 1  
PROCNO 1

F2 - Acquisition Parameters  
Date\_ 20070606  
Time 18.23  
INSTRUM dpx300  
PROBHD 5 mm BBO BB-1H  
PULPROG zg  
TD 32768  
SOLVENT CDCl3  
NS 8  
DS 0  
SMH 5402.485 Hz  
FIDRES 0.164871 Hz  
AQ 3.0327284 sec  
RG 71.8  
DM 92.550 usec  
DE 132.21 usec  
TE 0.0 K  
D1 1.00000000 sec  
MCREST 0.00000000 sec  
MCMRK 0.01500000 sec

===== CHANNEL f1 =====  
NUC1 1H  
P1 5.00 usec  
PL1 -2.00 dB  
SF01 300.1318000 MHz

F2 - Processing parameters  
SI 32768  
SF 300.1300064 MHz  
WDW EM  
SSB 0  
LB 0.50 Hz  
GB 0  
PC 1.00

1D NMR plot parameters  
CX 22.00 cm  
CY 11.67 cm  
F1P 8.500 ppm  
F1 2551.11 Hz  
F2P -0.500 ppm  
F2 -150.07 Hz  
PPMCM 0.40909 ppm/cm  
HZCM 122.78047 Hz/cm

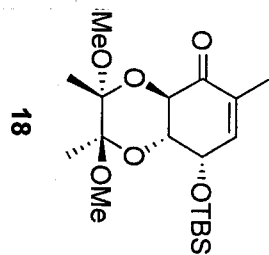

18

ppm

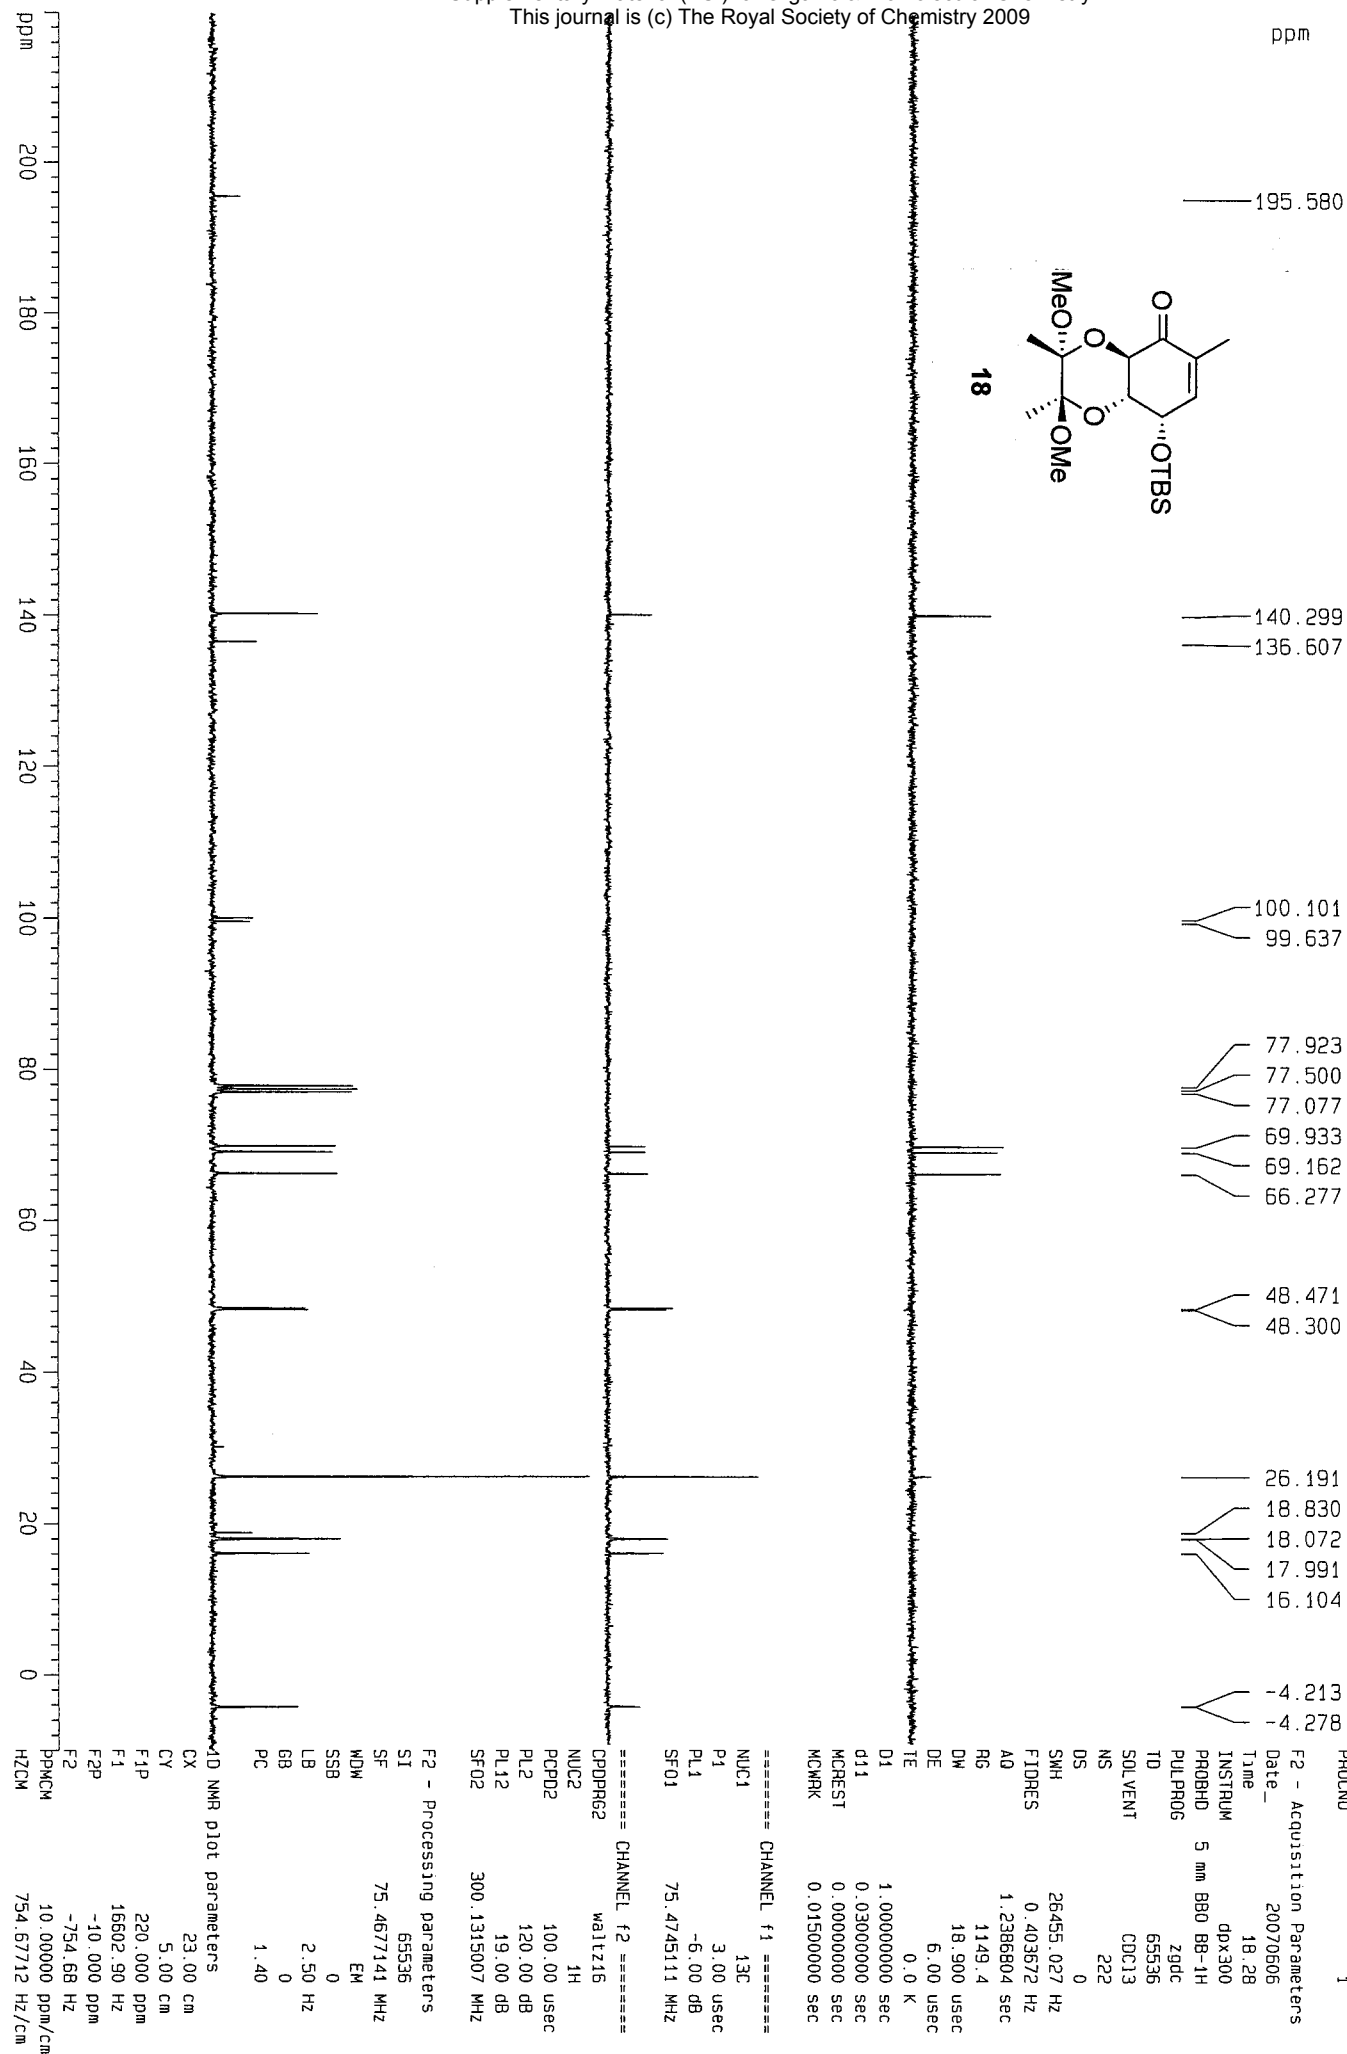





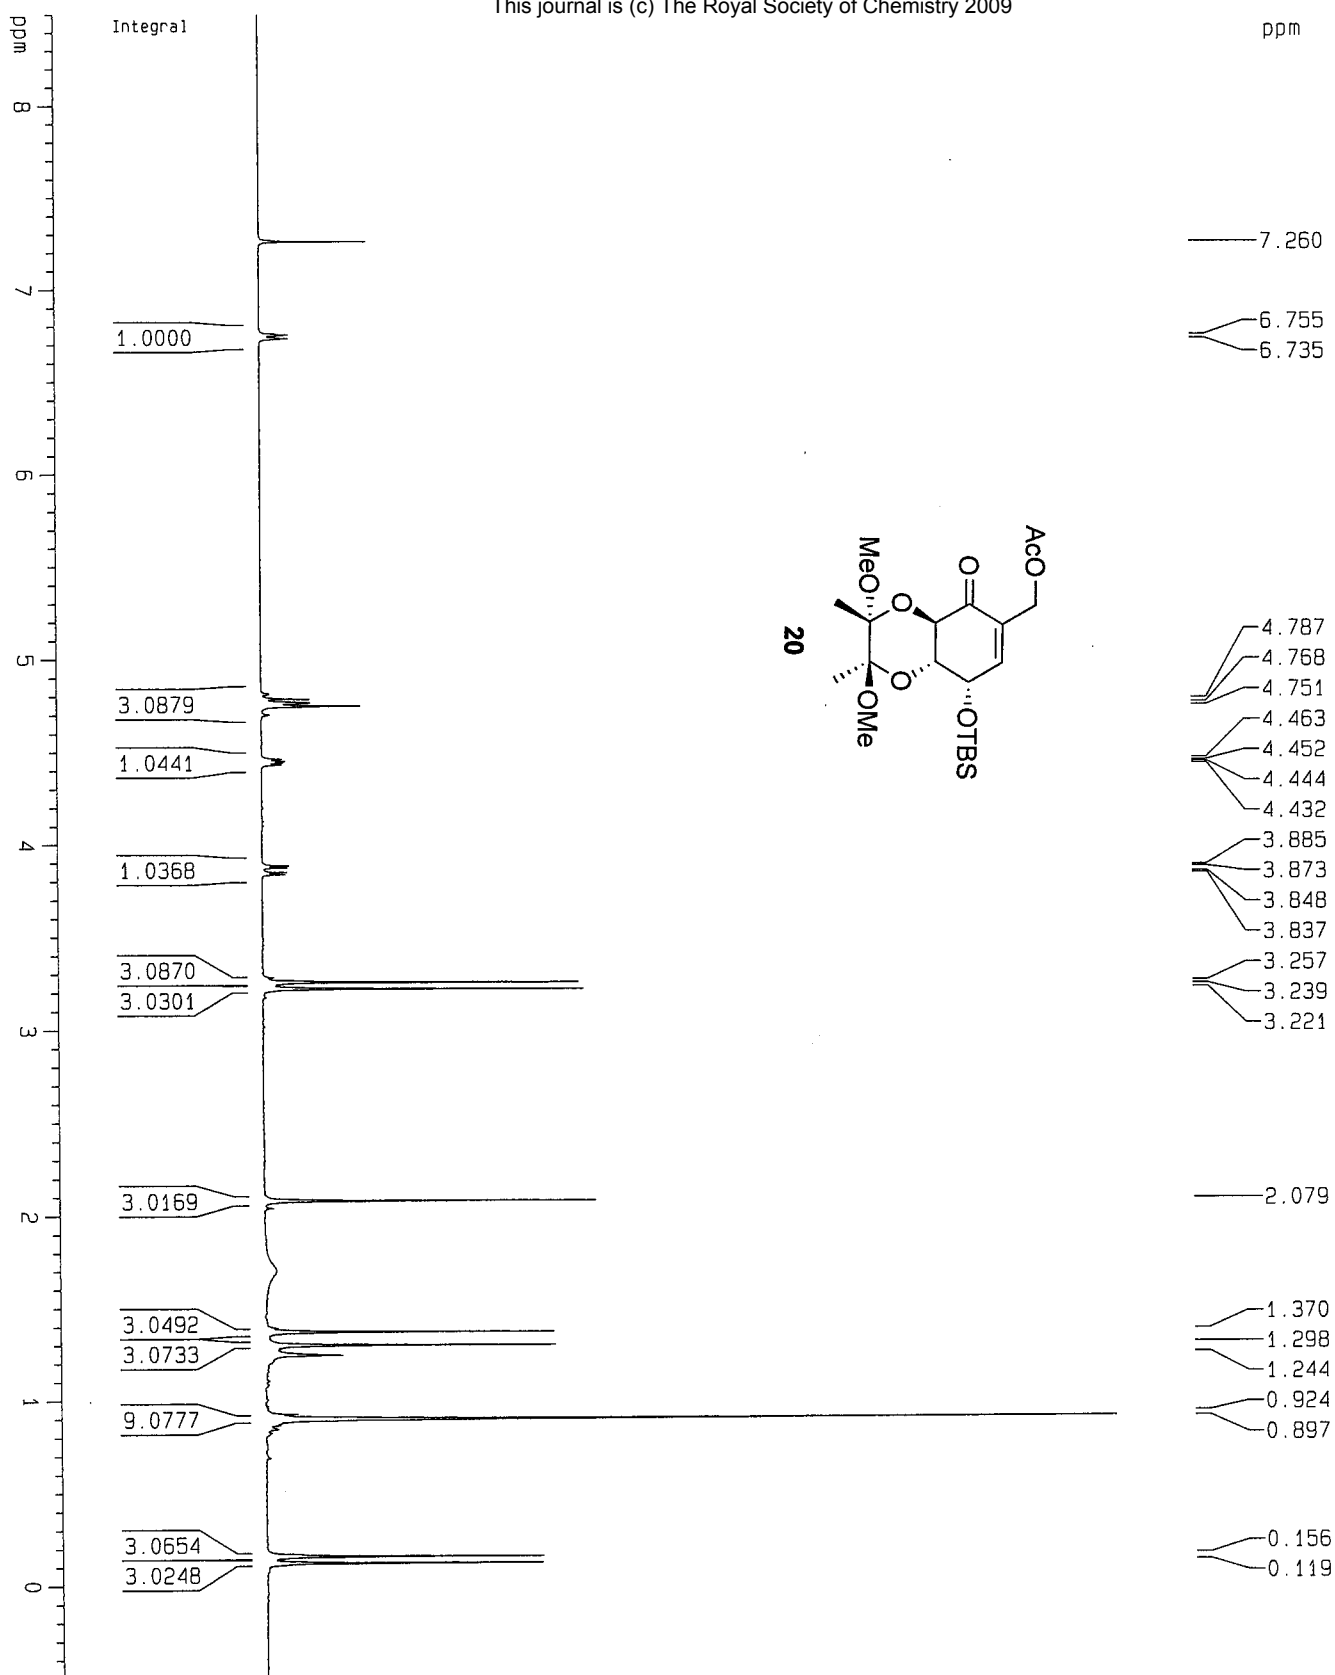

Current Data Parameters

|        |          |
|--------|----------|
| NAME   | GL144-h1 |
| EXPNO  | 1        |
| PROCNO | 1        |

F2 - Acquisition Parameters

|         |                |
|---------|----------------|
| Date_   | 20070530       |
| Time    | 20.16          |
| INSTRUM | dot300         |
| PROBHD  | 5 mm BBO BB-1H |
| PULPROG | zg             |
| TD      | 32768          |
| SOLVENT | CDCl3          |
| NS      | 8              |
| DS      | 0              |
| SWH     | 5402.485 Hz    |
| FIDRES  | 0.164871 Hz    |
| AQ      | 3.0327284 sec  |
| R6      | 228.1          |
| DW      | 92.550 usec    |
| DE      | 132.21 usec    |
| TE      | 0.0 K          |
| D1      | 1.00000000 sec |
| MCREST  | 0.00000000 sec |
| MCNRC   | 0.01500000 sec |

===== CHANNEL f1 =====

|      |                 |
|------|-----------------|
| NUC1 | 1H              |
| P1   | 5.00 usec       |
| PL1  | -2.00 dB        |
| SFO1 | 300.1318000 MHz |

F2 - Processing parameters

|     |                 |
|-----|-----------------|
| SF  | 300.1300064 MHz |
| WDW | EM              |
| SSB | 0               |
| LB  | 0.50 Hz         |
| GB  | 0               |
| PC  | 1.00            |

1D NMR plot parameters

|       |                 |
|-------|-----------------|
| CX    | 22.00 cm        |
| CY    | 11.33 cm        |
| F1P   | 8.500 ppm       |
| F1    | 2551.10 Hz      |
| F2P   | -0.500 ppm      |
| F2    | -150.07 Hz      |
| PPMCM | 0.40909 ppm/cm  |
| HZCM  | 122.78046 Hz/cm |

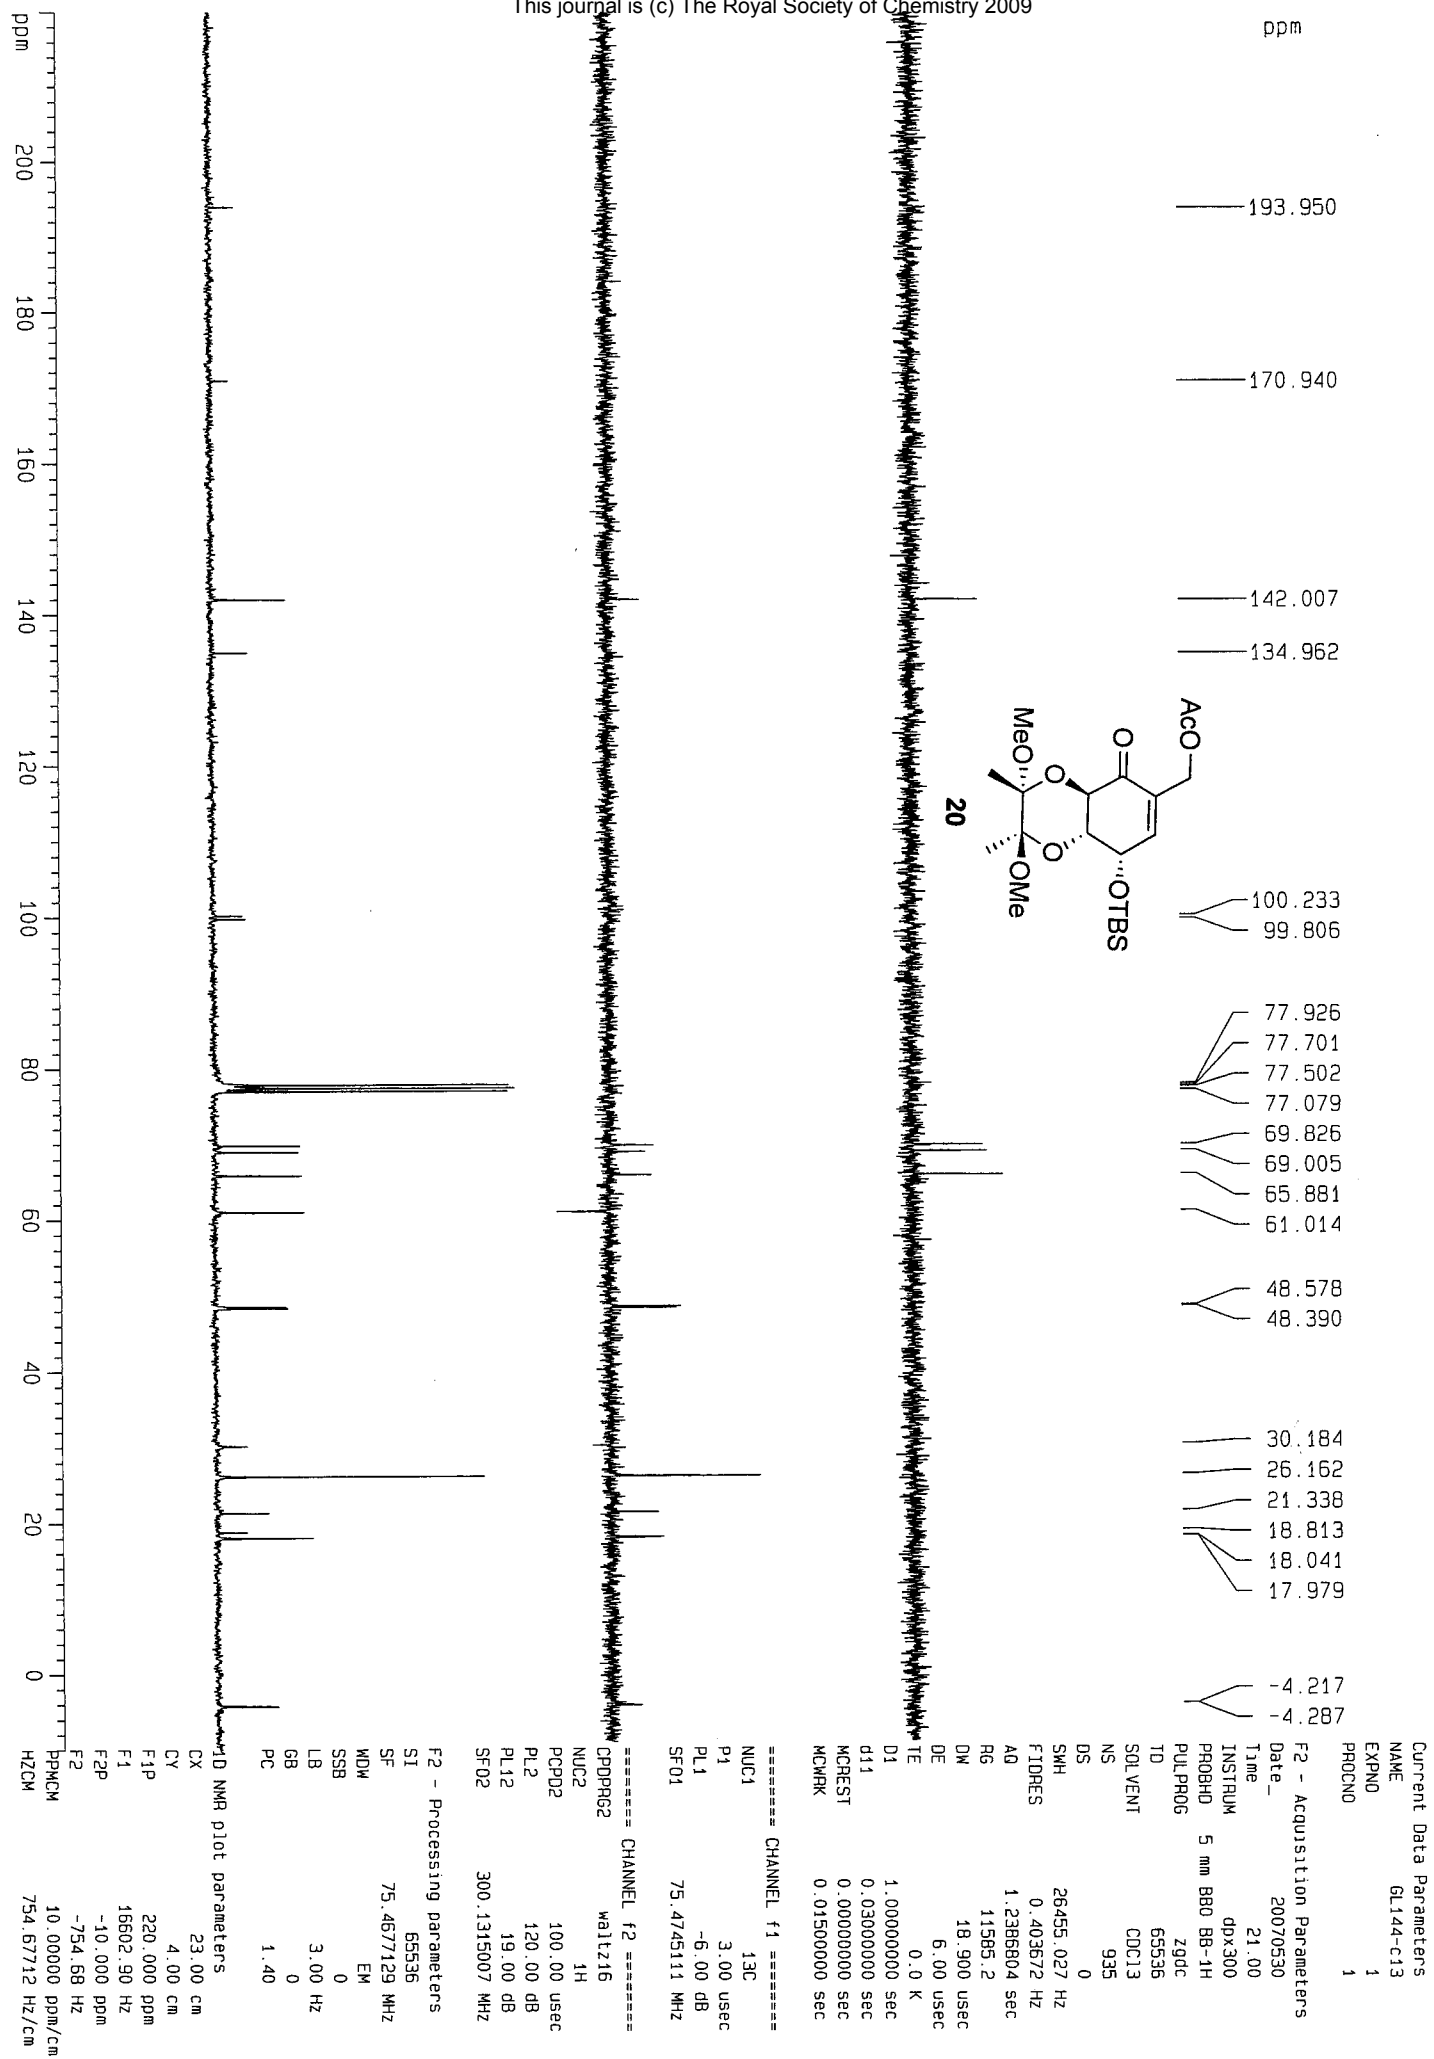

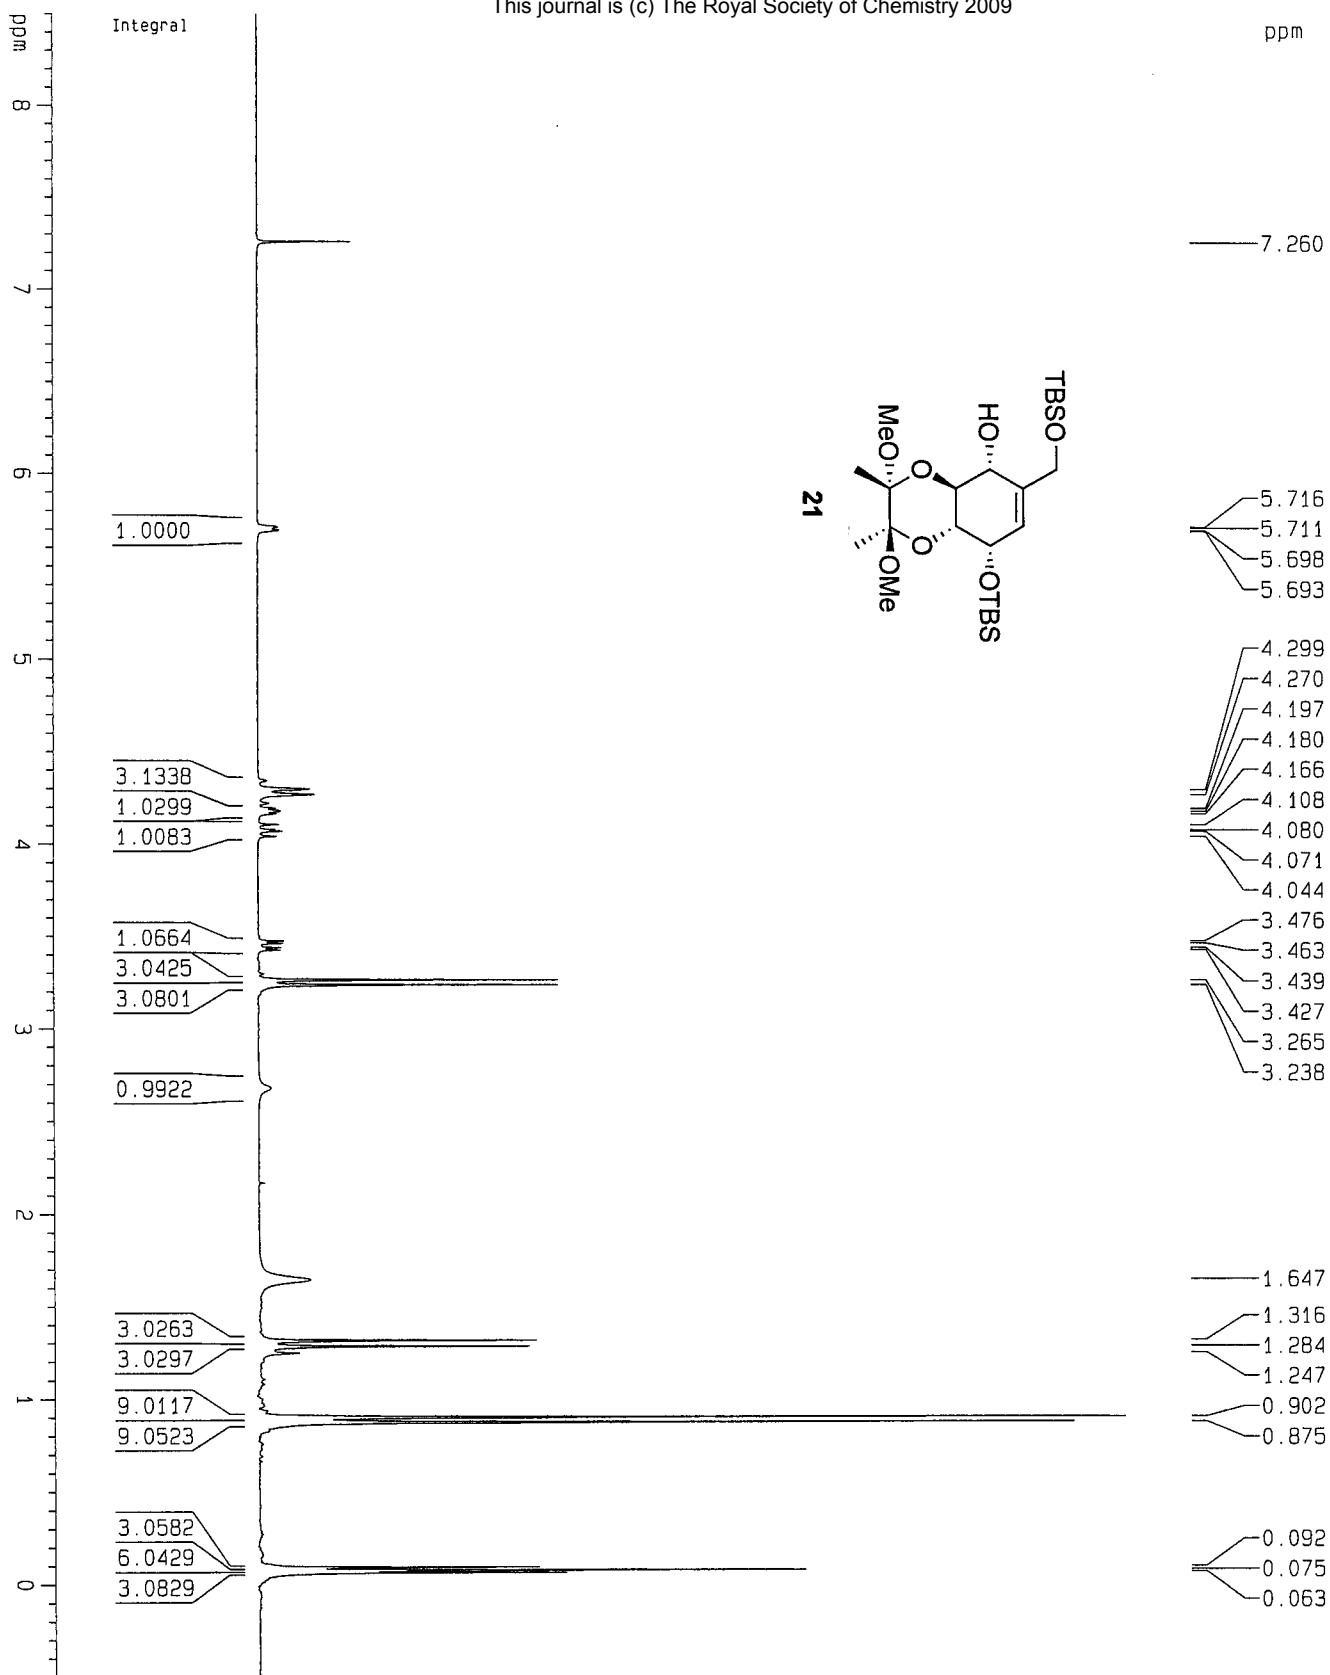

Current Data Parameters  
NAME GL146-h1  
EXPNO 1  
PROCNO 1

F2 - Acquisition Parameters  
Date\_ 20070530  
Time 19.22  
INSTRUM dpx300  
PROBHD 5 mm BB0 BB-1H  
PULPROG zg  
TD 32768  
SOLVENT CDCl3  
NS 8  
DS 0  
SWH 5402.485 Hz  
FIDRES 0.164871 Hz  
AQ 3.0327284 sec  
RG 228.1  
DE 132.21 usec  
TE 0.0 K  
D1 1.00000000 sec  
MCREST 0.00000000 sec  
MCMRK 0.01500000 sec

===== CHANNEL f1 =====  
NUC1 1H  
P1 5.00 usec  
PL1 -2.00 dB  
SF01 300.1318000 MHz

F2 - Processing parameters  
SI 32768  
SF 300.130062 MHz  
WDW EM  
SSB 0  
LB 0.50 Hz  
GB 0  
PC 1.00

1D NMR plot parameters  
CX 22.00 cm  
CY 11.33 cm  
F1P 8.500 ppm  
F1 2551.10 Hz  
F2P -0.500 ppm  
F2 -150.07 Hz  
PPMCM 0.40509 ppm/cm  
HZCM 122.78046 Hz/cm

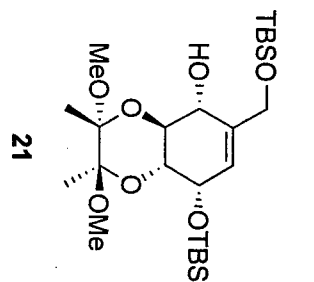

ppm

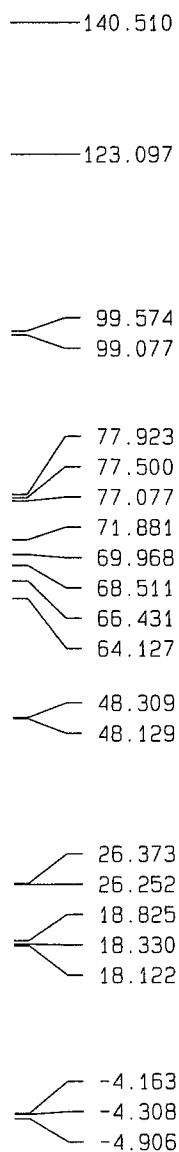

Current Data Parameters  
NAME GL146-c13  
EXPNO 1  
PROCNO 1

F2 - Acquisition Parameters  
Date\_ 20070530  
Time 19.49

INSTRUM dpx300  
PROBHD 5 mm BBO BB-1H  
PULPROG zgpg30  
TD 65536  
SOLVENT COC13  
NS 921  
DS 0  
SWH 26455.027 Hz  
FIDRES 0.403672 Hz  
AQ 1.2366804 sec  
RG 4597.6  
DM 18.900 usec  
DE 6.00 usec  
TE 0.0 K  
D1 1.00000000 sec  
d11 0.03000000 sec  
MCREST 0.00000000 sec  
MCMRK 0.01500000 sec

===== CHANNEL f1 =====  
NUC1 13C  
P1 3.00 usec  
PL1 -6.00 dB  
SF01 75.4745111 MHz

===== CHANNEL f2 =====  
CPDPRG2 waltz16  
NUC2 1H  
PCPD2 100.00 usec  
PL2 120.00 dB  
PL12 19.00 dB  
SF02 300.1315007 MHz

F2 - Processing parameters  
SI 65536  
SF 75.4677125 MHz  
WDW EM  
SSB 0  
LB 3.00 Hz  
GB 0  
PC 1.40

ID NMR plot parameters

CX 23.00 cm  
CY 4.00 cm  
F1P 220.000 ppm  
F1 16602.90 Hz  
F2P -10.000 ppm  
F2 -754.68 Hz  
PPMCM 10.00000 ppm/cm  
HZCM 754.67712 Hz/cm

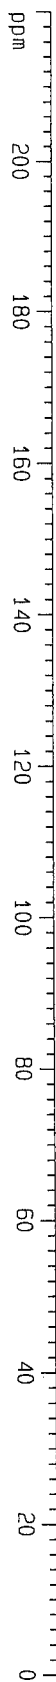



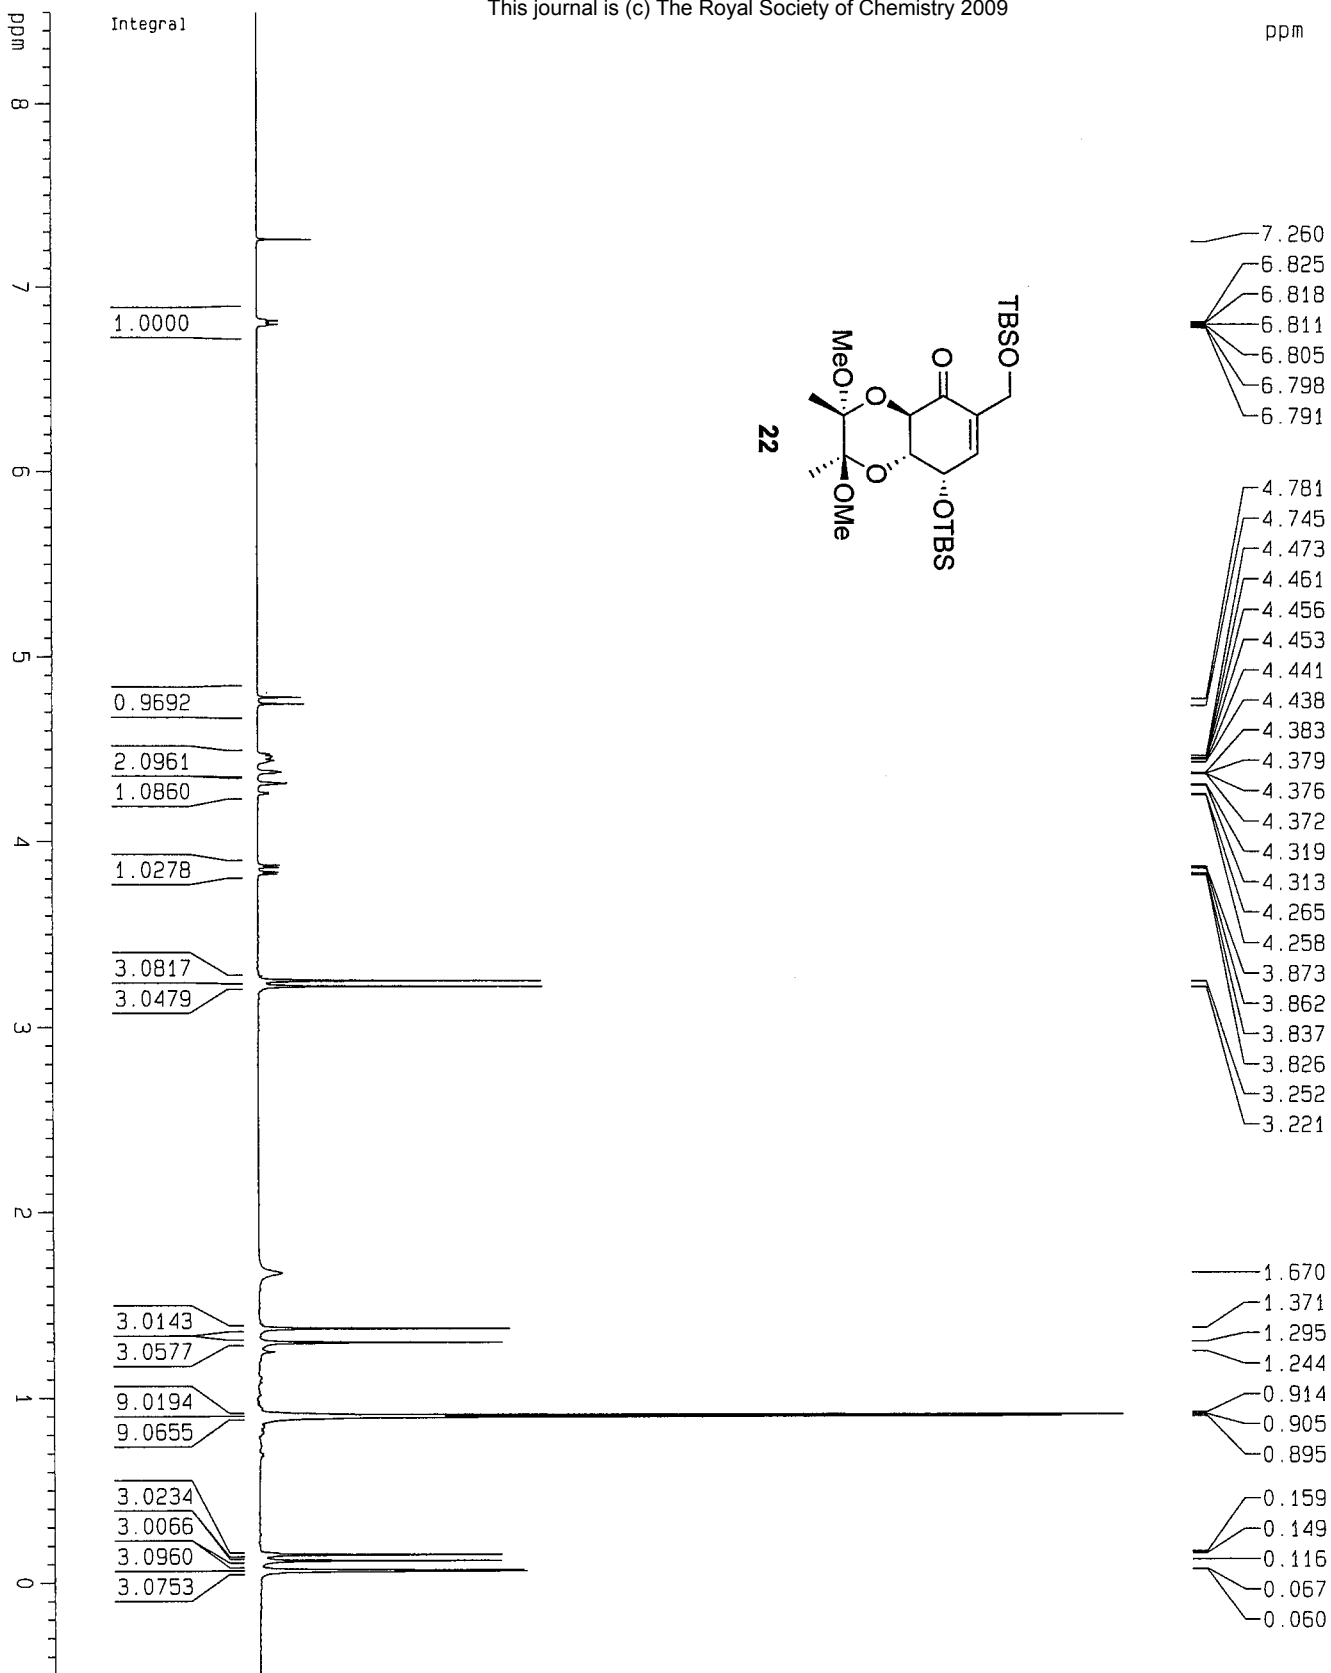

Current Data Parameters  
NAME 6L147-h1  
EXPNO 1  
PROCNO 1

F2 - Acquisition Parameters  
Date\_ 20070530  
Time 18.29  
INSTRUM dpx300  
PROBHD 5 mm BB0 BB-1H  
PULPROG zg  
TD 32768  
SOLVENT CDCl3  
NS 8  
DS 0  
SMH 5402.485 Hz  
FIDRES 0.164871 Hz  
AQ 3.0327284 sec  
RG 114  
DW 92.550 usec  
DE 132.21 usec  
TE 0.0 K  
D1 1.00000000 sec  
MCREST 0.00000000 sec  
MCWPK 0.01500000 sec

===== CHANNEL f1 =====  
NUC1 1H  
P1 5.00 usec  
PL1 -2.00 dB  
SF01 300.1318000 MHz

F2 - Processing parameters  
SI 32768  
SF 300.130062 MHz  
WDW EM  
SSB 0  
LB 0.50 Hz  
GB 0  
PC 1.00

1D NMR plot parameters  
CX 22.00 cm  
CY 11.48 cm  
F1P 8.500 ppm  
F1 2551.10 Hz  
F2P -0.500 ppm  
F2 -150.07 Hz  
PPMCM 0.40909 ppm/cm  
HZCM 122.78046 Hz/cm

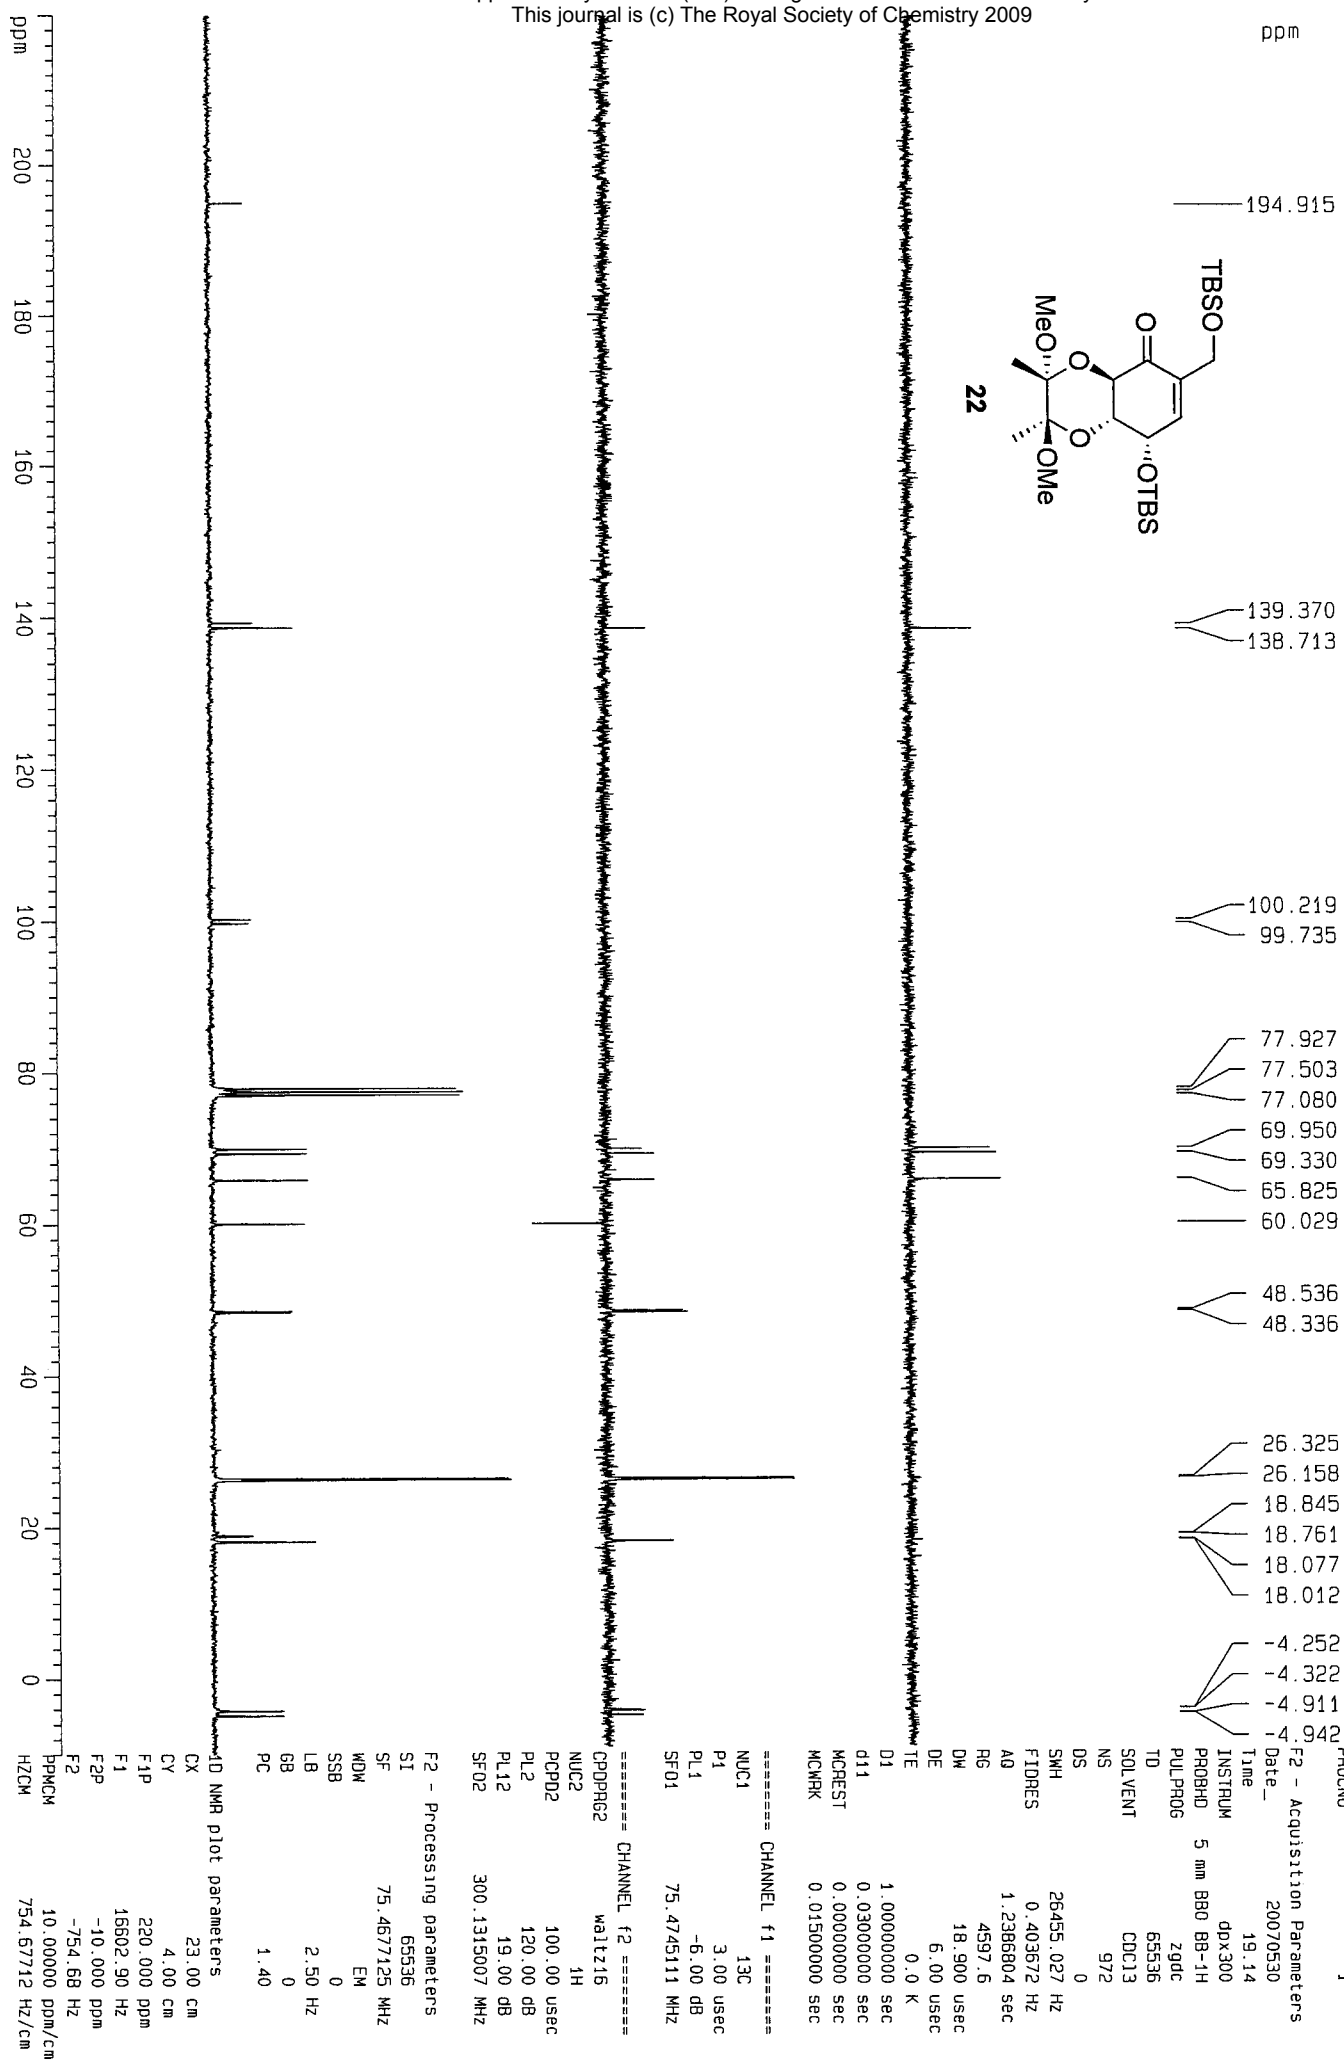

Supplement: b911810a.pdf [file b911810a.pdf]
